# Supplementary material for: Different Transcriptome Features of Peripheral Blood Mononuclear Cells in Non-Emphysematous Chronic Obstructive Pulmonary Disease
Source: Int J Mol Sci. 2023 Dec 20;25(1):66. doi: 10.3390/ijms25010066 (PMC10779039; doi:10.3390/ijms25010066)
Supplement: Supplementary file 1 [file ijms-25-00066-s001.zip › 121423 supplementary Table S1.xlsx]

## Sheet: DEGs between COPD and HC
Gene	p-value	q-value	Difference	Fold change		HC	HC	HC	HC	HC	HC	HC	HC	HC	HC	HC	HC	HC	COPD	COPD	COPD	COPD	COPD	COPD	COPD	COPD	COPD	COPD	COPD	COPD	COPD	COPD	COPD	COPD	COPD	COPD	COPD	COPD	COPD	COPD	COPD	COPD	COPD	COPD
RNU2-2P	6.96916e-06	0.0136072	1.54738	2.92285		3.4822	2.4467	0.97062	0.8167	-0.66864	0.47906	-0.13152	2.6625	1.7783	2.4854	-0.32292	0.80194	1.0946	2.9024	3.3635	3.0415	3.1897	3.1748	2.9554	3.2494	3.2783	2.0509	2.796	2.0613	3.6534	2.5772	2.6543	2.0137	3.0657	2.4802	2.7751	3.411	2.6332	3.7019	2.7911	3.0196	1.9134	1.9234	1.3453
SNORD3D	3.14414e-05	0.024703	1.77828	3.43016		-0.68771	-1.6724	-3.5099	-1.1833	-0.66864	-1.1059	-3.8245	-0.92243	-0.80663	-1.0996	-1.5361	-0.78303	-2.7088	-0.26754	2.4307	-0.76585	1.7747	-1.2176	-1.0446	0.83442	0.95638	1.0509	1.6805	0.47633	0.59454	-0.59271	-0.66759	-0.79361	-0.84123	-0.84172	-1.9343	0.826	0.89625	0.76332	-0.79386	-0.68087	0.69097	1.3385	1.3453
MSRB3	0.000170135	0.0409847	1.76682	3.40304		0.31229	1.9162	-1.3513	-3.0788	-1.9052	-2.4273	1.4534	-0.92243	0.19337	-3.166	0.26204	-0.78303	0.77266	2.4329	-1.0288	1.5561	2.3596	2.4829	0.95539	0.83442	1.2783	1.0509	0.6805	1.4763	1.0096	0.99226	1.3324	0.79135	1.4807	-0.84172	0.90061	0.826	0.89625	1.1783	2.6656	1.9041	0.10601	2.1458	-0.97659
SNORD8	0.000189705	0.0409847	1.58896	3.00832		3.6342	2.7463	-0.3513	1.8167	0.91633	2.9816	-1.976	3.8324	4.0514	3.7584	1.847	2.217	2.4731	3.4329	3.3635	3.8191	4.971	3.7824	3.5403	5.1074	4.1263	4.1383	4.305	3.8914	4.682	4.4073	3.7918	2.7913	4.0167	3.4802	3.3156	3.6334	3.2182	3.3483	3.4541	3.963	2.8064	2.7979	3.0234
MIR3671	0.000232011	0.0441872	1.69927	3.24737		-0.68771	-2.9162	-2.795	-1.1833	0.33136	-3.2712	-1.1315	0.077566	-3.0817	-2.7677	-1.3229	-0.78303	-4.5824	0.73247	-2.3046	1.2342	-2.4053	-0.21756	0.95539	0.83442	-1.0436	0.63584	-2.2269	0.89137	0.0095765	-1.7919	-0.66759	-0.79361	0.74373	0.15828	0.90061	-0.75896	0.31128	0.17835	0.7911	0.31913	0.10601	0.33846	-0.97659
ARL15	0.00033621	0.0512258	1.38844	2.61796		0.31229	-1.2537	-0.3513	-0.1833	-2.6803	-1.1059	-1.1315	-2.8112	-2.5554	0.9004	-1.3229	-0.78303	-2.0063	0.31743	1.5562	0.23415	1.5116	-1.2176	0.54036	0.83442	-0.043625	1.0509	-1.5905	1.2133	0.59454	0.99226	0.33241	-0.79361	0.15877	0.15828	0.31565	-0.75896	-0.68872	0.17835	-2.2823	0.31913	1.691	0.92342	0.60838
IQCG	0.000385335	0.0523684	1.1282	2.18585		-0.68771	0.33122	0.23366	1.4017	-0.66864	1.4791	-0.13152	1.0776	0.19337	0.48537	0.26204	-2.6941	-1.2273	1.3174	0.55619	1.5561	1.9971	0.3674	1.5403	-0.75055	0.54134	1.3728	1.0955	0.89137	1.3315	0.99226	2.5023	1.7914	1.4807	1.1583	0.31565	1.563	1.3113	1.1783	1.7911	0.9041	0.10601	0.92342	1.6084
ENTPD7	0.000402371	0.0524895	1.25752	2.39084		1.3123	-1.2537	-2.6988	1.1386	1.6533	1.4791	0.45344	1.3995	0.19337	0.9004	-1.3229	1.5389	-1.2273	1.0544	1.9712	1.5561	2.1897	1.7824	1.7628	1.5714	0.54134	2.7513	1.4175	1.2133	2.3315	0.40729	1.6543	1.5283	1.7437	1.4802	0.90061	1.826	1.3113	2.3483	1.7911	1.3191	0.10601	1.9234	1.3453
SERAC1	0.000487754	0.0560871	1.38987	2.62055		-0.68771	1.7463	0.23366	1.1386	0.91633	-1.1059	-2.961	-2.9854	1.1934	1.4854	0.99901	1.8019	0.77266	0.31743	2.1411	1.2342	2.3596	1.3674	1.7628	0.83442	0.54134	2.2208	2.555	1.2133	1.0096	1.4073	1.6543	0.79135	1.9661	1.9656	1.6376	2.0484	2.3113	1.7633	2.5281	1.9041	0.69097	1.6604	1.3453
CD1A	0.000639022	0.0633255	1.73882	3.33763		-2.2924	-2.8482	-0.3513	0.40166	1.9163	-1.1059	-0.13152	-2.8781	0.19337	1.7078	-3.8132	-2.8204	1.3576	-0.26754	1.5562	1.8191	-0.81031	-1.2176	1.2773	1.5714	0.95638	1.8582	-0.90447	1.2133	1.5945	2.2146	1.9174	1.2064	0.74373	1.9656	0.90061	1.241	-0.68872	0.76332	0.7911	0.9041	0.10601	2.1458	1.0234
GPER1	0.000707841	0.0643871	1.89933	3.7304		-3.1986	-2.7908	-4.3085	1.1386	-0.66864	2.216	-2.6562	-2.4219	-3.2889	-1.0996	-0.32292	-1.9081	-1.2273	-0.26754	-0.028771	1.8191	1.5116	0.78244	0.95539	1.2494	-2.2524	3.1383	1.0955	1.4763	0.0095765	-0.59271	0.33241	2.0137	-0.84123	-2.8865	0.90061	-0.75896	-0.68872	-0.82165	1.2061	-0.68087	0.69097	0.92342	0.023416
TIAM2	0.00113397	0.0738292	-1.55939	0.339294		0.89726	-0.25374	1.4561	1.4017	0.91633	-1.1059	-0.13152	1.0776	-0.80663	0.48537	1.999	1.8019	1.58	0.73247	-0.028771	-2.7359	0.77466	-3.2082	-1.0446	-3.3318	0.95638	-3.2988	-1.9603	0.89137	0.59454	-0.59271	-0.66759	0.79135	-1.9764	-0.84172	-0.68435	0.24104	-0.68872	0.17835	-0.79386	-2.5247	-0.89399	-2.4054	0.60838
LOC101929340	0.00166885	0.0806921	-1.26254	0.416808		-0.68771	-0.25374	-1.3513	-1.1833	-0.66864	-3.4785	0.86847	-0.92243	-0.80663	-2.3054	0.67708	-0.78303	-2.228	-2.6941	-2.4711	-3.2496	0.77466	-3.5633	-3.0805	-0.75055	-3.0364	-2.5265	-0.90447	-3.7764	-3.1964	-2.1371	-2.0487	-0.79361	-3.001	-1.8905	-2.4534	-1.9368	-2.2957	-0.82165	-2.1454	-2.2432	-2.4434	-3.4451	-2.9422
PROS1	0.00177132	0.0806921	1.91157	3.76219		-2.4359	1.7463	-3.3788	-2.1354	-0.66864	-3.0181	0.45344	-3.3035	0.19337	-2.7466	-0.32292	-0.78303	-1.2273	1.3174	-1.0288	1.8191	2.1897	2.7824	0.54036	0.24945	2.5413	2.0509	-0.90447	2.3508	0.59454	0.99226	0.91737	-0.79361	-0.84123	-2.8361	0.90061	-0.75896	-4.522	0.17835	1.2061	2.1265	0.69097	1.6604	1.0234
CDK18	0.00192138	0.0809832	-1.4335	0.370232		0.31229	-1.8624	-0.3513	-1.1833	-1.9628	0.47906	0.86847	0.077566	0.77833	-0.099597	0.26204	-1.6329	0.35763	-0.26754	-3.0299	-3.8354	-0.81031	-2.6845	0.95539	-1.8548	-0.043625	-2.614	0.095533	-1.1086	-2.257	-2.4267	-0.66759	-2.3689	-3.688	-3.1981	-2.4487	-0.75896	-3.1456	-1.8917	0.20614	-2.4158	-2.2057	0.33846	-3.0589
PDGFC	0.00193339	0.0809832	1.02965	2.04152		-0.68771	1.0682	1.4561	1.6241	0.91633	1.216	2.1904	1.3995	1.1934	0.48537	-0.32292	-0.78303	1.3576	1.9024	1.2932	3.2341	3.1897	2.4829	1.5403	1.5714	2.5413	3.1383	1.0955	0.47633	2.469	1.7292	2.5023	1.5283	0.15877	1.9656	2.6376	0.24104	1.6332	0.17835	2.6656	1.9041	2.4279	2.1458	2.3453
SCARNA3	0.00232897	0.0876165	1.52419	2.87625		2.3123	1.5536	-1.3513	1.6241	2.3314	1.7014	-3.69	1.8849	2.0007	1.7078	-3.5964	0.80194	-0.22734	1.7325	1.9712	2.0415	3.2772	1.3674	2.5403	3.6418	3.2783	1.8582	2.6805	2.2133	2.8169	2.4073	2.6543	1.2064	2.1588	1.9656	2.3156	2.0484	0.31128	1.5003	2.2061	1.3191	2.2759	1.3385	0.60838
HNRNPH2	0.0024193	0.0892053	1.32167	2.49955		-0.68771	-1.2537	-3.4808	0.8167	-1.521	-2.3987	-1.1315	-0.92243	-0.80663	-3.0524	-1.3229	-0.78303	-3.1688	0.31743	0.97123	-0.76585	0.77466	0.3674	0.54036	0.24945	-0.043625	0.63584	-1.3771	-1.1086	-0.99042	0.99226	-1.855	0.79135	-2.2533	1.7432	0.90061	-0.75896	0.31128	0.17835	0.20614	-2.6507	0.10601	0.33846	-2.6829
IL1R2	0.00253802	0.0901219	1.23217	2.34921		0.89726	1.3312	-3.4413	-1.1833	1.6533	-0.1059	-0.13152	1.0776	-0.80663	1.2223	-0.32292	0.80194	0.35763	1.0544	1.7786	2.6936	2.3596	1.3674	2.4148	0.83442	1.7637	3.6358	1.6805	1.2133	0.0095765	1.7292	0.91737	2.2064	0.74373	0.74324	0.31565	1.563	-0.68872	0.76332	1.2061	0.31913	1.4279	2.6604	0.023416
EBF4	0.00259301	0.0901219	-1.18544	0.439691		-0.68771	0.74626	0.6487	-0.1833	-1.8675	-0.1059	-1.1315	-0.92243	-0.80663	-1.0996	-1.3229	0.80194	0.35763	-1.2675	-3.0136	-0.76585	-0.81031	-1.8036	-2.5132	-1.3779	-3.5766	-0.94912	-0.90447	-1.1086	0.0095765	-2.3639	-2.3778	-3.9402	-1.4559	-2.0232	-0.68435	0.826	-2.7942	-0.82165	-2.5924	-0.68087	-2.9269	-2.0741	0.023416
SCOC-AS1	0.00265824	0.09076	1.30985	2.47915		0.89726	-1.2537	-4.2111	-1.1833	-3.5543	-3.0714	-0.13152	-2.9785	-3.3523	-3.0104	-3.7278	0.21698	-2.5541	-1.2675	-1.0288	-0.76585	-0.81031	-1.2176	0.95539	0.24945	-1.0436	0.050876	-2.3248	-1.1086	-0.99042	-1.6994	-2.1858	-0.79361	-0.84123	-1.9388	-0.68435	-0.75896	-0.68872	0.76332	1.2061	-1.6728	-1.5382	-0.66154	-0.97659
SNORD57	0.00278016	0.0919831	1.15712	2.23012		5.1703	3.9162	0.6487	4.3403	3.9752	3.801	2.0384	5.3064	5.0514	5.0089	1.4844	3.4649	3.2962	4.287	5.479	5.2785	6.0099	5.2254	5.5403	6.6503	5.3658	4.2988	5.4531	4.9999	5.4853	4.9309	4.7247	3.9613	4.9401	4.6501	4.9304	4.4505	3.5592	4.7019	4.698	4.6767	4.2759	3.5864	2.9303
DIXDC1	0.00287345	0.0931502	-1.42939	0.371288		-0.68771	-0.25374	1.6487	-0.1833	0.33136	-1.5068	0.86847	0.077566	-0.80663	-1.0996	-1.3229	1.217	0.35763	-2.9929	-1.0288	-3.6413	-3.0736	-2.4568	-2.091	0.24945	-2.5397	-2.7823	-2.1719	-0.10863	-0.99042	0.40729	-3.3522	-0.79361	-0.84123	0.15828	-2.7644	0.24104	0.89625	-2.1882	-0.79386	-2.2255	-2.9125	-3.1109	1.0234
DIP2C	0.00338027	0.0994481	-1.22225	0.428613		0.31229	-0.25374	1.4561	0.40166	1.6533	1.216	0.45344	0.66253	1.5153	2.2223	1.847	1.217	1.58	-1.2675	-0.028771	-0.76585	0.77466	-0.21756	-0.044608	0.83442	-2.8164	-0.94912	1.0955	1.2133	0.59454	1.7292	0.33241	0.79135	-0.84123	-2.7167	2.123	-0.75896	1.3113	0.17835	-0.79386	0.31913	-2.6707	0.33846	-0.97659
ELL2	0.00367137	0.101723	1.23322	2.35091		2.8973	1.3312	-1.3513	2.2761	0.91633	2.064	0.45344	2.0776	1.7783	2.0703	0.99901	-2.953	1.9426	1.9024	-1.0288	2.8191	2.1897	2.3674	3.2033	2.4194	3.0438	2.9578	2.9029	2.3508	1.3315	1.9923	2.9174	3.2938	2.3287	2.6177	2.123	2.0484	2.7707	1.9857	2.9066	3.5671	1.9134	1.6604	2.4829
ANKRD20A9P	0.00367201	0.101723	-1.43752	0.369201		0.31229	-0.25374	3.4036	0.40166	-0.66864	0.8941	1.8685	0.077566	0.19337	0.48537	1.847	1.217	1.0946	-0.26754	0.55619	0.23415	-0.81031	-3.0204	-1.0446	-2.8742	-1.0436	-0.94912	-2.8939	0.89137	-3.1528	0.99226	1.3324	-0.79361	0.15877	0.15828	-0.68435	-2.9806	0.89625	0.17835	1.5281	-0.68087	0.10601	-2.4898	1.0234
LINC00618	0.00398133	0.105831	-1.27613	0.412901		1.8973	-1.2537	-1.3513	-0.1833	-0.66864	-1.1059	-0.13152	0.66253	-0.80663	0.9004	1.262	0.80194	0.77266	-1.2675	-0.028771	-2.1281	0.77466	-1.2176	-1.0446	-0.75055	0.95638	-3.183	-0.90447	-2.5353	0.0095765	-2.2596	-3.4349	-0.79361	-3.0478	-0.84172	-2.3809	0.826	0.31128	-2.61	-0.79386	-0.68087	-0.89399	-0.66154	-3.007
EHHADH	0.00408886	0.106104	1.11792	2.17034		-0.68771	-0.25374	-1.3513	0.8167	-0.66864	-1.1059	-1.1315	0.077566	-0.80663	-0.099597	-1.3229	0.21698	-3.2322	-1.2675	-0.028771	0.81911	0.18969	1.5898	0.54036	-0.75055	0.95638	1.0509	0.6805	0.47633	0.0095765	1.7292	1.6543	-0.79361	-0.84123	1.7432	-2.6832	0.24104	1.8963	1.7633	0.20614	1.3191	0.10601	-0.66154	0.023416
PKN3	0.00421745	0.106104	-1.11628	0.461283		-0.68771	-0.25374	0.23366	-1.1833	-0.66864	1.216	0.45344	0.077566	0.19337	-0.099597	-1.3229	-0.9858	-1.2273	-1.2675	-1.0288	-2.4094	-2.1499	-1.2176	-3.6983	-0.75055	-2.6291	-2.5571	-2.5519	-2.7697	-0.99042	-0.59271	-1.0361	-0.79361	0.15877	-0.84172	-0.78955	0.826	-3.0834	-3.4462	-0.79386	-2.1733	0.69097	-0.66154	-0.97659
CSF1	0.00451772	0.108556	1.33841	2.52872		-0.68771	0.33122	-2.8607	-1.1833	-1.3639	-2.7252	-2.7089	-3.1703	0.19337	-3.2244	-1.3229	-0.78303	-1.2273	0.31743	0.55619	-3.3985	-2.9079	1.1044	-2.709	-0.75055	-0.043625	-0.94912	1.4175	-1.1086	0.0095765	-0.59271	0.91737	0.20639	0.15877	1.4802	-0.68435	1.241	0.89625	1.1783	-0.79386	-0.68087	0.10601	0.33846	-1.9763
LACE1	0.00496973	0.112805	-1.18601	0.439516		0.31229	-0.25374	0.6487	-0.1833	-0.66864	-1.1059	-2.2982	0.077566	-0.80663	0.48537	-0.32292	-2.6351	0.35763	-2.7429	-1.0288	-3.0643	-2.4421	-1.2176	-1.0446	-2.1391	-1.0436	-0.94912	-1.6736	-3.2954	-0.99042	-2.0297	0.91737	-3.4046	-0.84123	-0.84172	-3.8662	-0.75896	-2.2172	-2.6767	0.20614	-0.68087	0.10601	-2.9862	-2.9167
NKD1	0.00512271	0.11457	-1.27627	0.412861		0.89726	-1.2537	-2.8028	-0.1833	-0.66864	0.47906	-1.1315	0.66253	-0.80663	0.9004	-1.3229	-0.78303	0.35763	-0.26754	-0.028771	-0.76585	-0.81031	-1.2176	-2.7509	-3.5118	-4.1177	-3.6241	-2.1221	-2.024	-0.99042	-2.7734	-2.3852	0.20639	-2.1884	-1.9622	-0.68435	0.24104	-3.2927	-2.3629	-2.927	-1.8389	0.10601	0.33846	-2.7401
LINC01503	0.00520758	0.115409	1.15224	2.22259		-0.68771	0.74626	-3.6546	1.1386	2.3314	1.216	1.6758	1.6625	-0.80663	-0.099597	-0.32292	-0.78303	-1.2273	2.7325	-0.028771	1.5561	0.77466	1.9524	-0.044608	0.83442	1.2783	1.3728	2.796	1.2133	1.0096	0.99226	0.91737	0.79135	1.1588	1.7432	2.4856	1.826	-0.68872	1.1783	2.5281	1.3191	0.69097	0.92342	1.0234
IL1R1	0.00531144	0.116024	1.29201	2.44869		-0.68771	-2.4943	-3.2333	-2.477	-0.66864	-2.9493	-3.2968	-3.1619	-0.80663	-3.0054	-1.3229	-0.78303	-2.9029	-2.1051	-1.0288	-0.76585	-0.81031	1.3674	0.54036	0.24945	0.54134	-0.94912	-3.896	0.47633	-0.99042	-0.59271	-2.6256	-0.79361	-3.5611	0.15828	-0.68435	-2.732	0.31128	0.17835	0.20614	-0.68087	0.10601	-2.9298	-0.97659
WBP5	0.00533171	0.11605	1.3266	2.5081		0.89726	1.9162	-4.0892	-0.1833	-2.6432	1.7014	-0.13152	-0.92243	1.1934	-0.099597	-0.32292	-0.78303	0.77266	1.7325	0.55619	1.5561	2.3596	2.1044	0.95539	1.5714	0.95638	2.0509	1.9029	1.6987	0.59454	-2.2598	1.3324	-0.79361	-0.84123	1.9656	0.31565	1.241	1.6332	1.5003	2.3761	1.3191	0.10601	2.1458	1.0234
APCDD1	0.00562561	0.119461	1.30715	2.47452		-1.4463	-1.2537	-1.3513	1.6241	-3.3955	-1.8309	-1.7313	0.077566	-2.67	-2.4548	-1.3229	-0.78303	-1.2273	0.73247	-1.0288	0.23415	-0.81031	0.78244	-2.2477	0.24945	-2.2982	2.0509	1.4175	-1.1086	-1.8828	0.40729	0.33241	0.20639	-0.84123	0.74324	-3.0211	-0.75896	0.31128	-0.82165	1.7911	0.31913	0.69097	1.6604	1.3453
SH3PXD2B	0.00580809	0.12164	1.43108	2.69648		-2.3371	0.74626	-1.3513	0.8167	-1.7752	-2.7856	-3.5869	-0.92243	-3.9974	-3.0983	-2.6507	-2.1413	-0.22734	1.0544	0.55619	-2.7421	0.18969	1.3674	0.54036	-0.75055	-0.043625	1.0509	-0.90447	-0.10863	-2.051	-0.59271	-2.0804	-0.79361	-0.84123	0.74324	1.3156	0.24104	-2.7906	0.17835	-1.9034	0.31913	-3.314	0.33846	1.6084
KIF14	0.00598355	0.123198	1.30496	2.47076		-1.8891	1.3312	-4.7515	0.8167	0.33136	-1.1059	-1.1315	0.077566	-3.1359	-0.099597	1.262	0.21698	-0.22734	1.0544	0.97123	1.2342	0.18969	-1.2176	1.2773	-0.75055	-0.043625	1.8582	1.9029	-0.10863	0.59454	0.40729	1.9174	2.0137	-0.84123	2.3282	0.90061	-0.75896	1.3113	-0.82165	0.20614	0.31913	1.691	1.6604	0.023416
LOC101927100	0.00613938	0.124643	1.13529	2.19663		-2.7934	-0.25374	-3.3631	-0.1833	-1.9907	-1.1059	-1.1315	-0.92243	-2.3618	-3.6709	-2.9715	-0.78303	-1.2273	-0.26754	-1.0288	-0.76585	0.77466	0.3674	-0.044608	-0.75055	-1.0436	0.63584	0.095533	-2.2548	0.0095765	-0.59271	-0.66759	-3.3366	-0.84123	0.15828	-2.1749	-0.75896	0.31128	0.17835	-0.79386	0.31913	-2.3542	1.3385	-2.5123
B3GNT8	0.00618759	0.124846	1.09293	2.13307		0.31229	-0.25374	-1.3513	0.40166	1.3314	-1.1059	-0.13152	-0.92243	0.19337	-1.0996	-1.3229	-3.1861	-0.22734	-1.2675	1.9712	0.23415	0.77466	1.3674	0.95539	1.2494	1.2783	2.3728	2.4175	0.47633	0.0095765	-0.59271	-0.66759	-1.5834	0.15877	-0.84172	1.3156	0.24104	0.89625	-0.82165	-0.79386	0.9041	1.691	1.3385	0.60838
LOXL2	0.00637174	0.125766	-1.11528	0.4616		0.89726	0.74626	-1.3513	0.40166	1.6533	0.47906	-1.1315	-0.92243	1.1934	0.48537	-2.4018	-0.78303	-2.1804	-2.7393	-1.0288	-0.76585	-0.81031	-2.6254	-2.2865	-0.75055	-1.0436	-2.8895	0.095533	-1.1086	-0.99042	-2.6847	-0.66759	0.79135	-0.84123	-1.7719	-2.3475	-0.75896	-2.763	0.17835	-2.9328	-0.68087	-0.89399	-0.66154	-1.848
DCLRE1A	0.00649693	0.126503	1.33769	2.52747		0.31229	1.3312	-1.3513	-2.4307	-3.8729	-3.3544	-3.4007	0.66253	-0.80663	0.48537	-0.32292	1.8019	-1.2273	0.31743	2.4307	0.81911	1.1897	1.1044	-0.044608	0.83442	0.54134	0.050876	-0.90447	1.4763	0.0095765	0.40729	-1.8539	1.2064	0.74373	1.7432	-0.68435	1.563	1.3113	1.1783	-0.79386	-0.68087	-0.89399	0.33846	-0.97659
NEU3	0.00652498	0.126541	1.12503	2.18106		1.6342	-1.2537	-2.2605	0.40166	0.33136	0.8941	1.1904	-3.3301	1.1934	-1.0996	-0.32292	-1.8596	-0.22734	-0.26754	1.5562	1.5561	1.1897	1.5898	0.95539	0.24945	-1.0436	-0.94912	-0.90447	1.2133	1.0096	0.99226	1.6543	1.7914	0.74373	0.15828	1.3156	1.241	1.6332	0.76332	-0.79386	2.1265	0.10601	1.3385	0.60838
MRC1	0.00667851	0.127191	1.15613	2.22859		1.6342	1.9162	-0.3513	0.8167	1.6533	-1.1059	0.86847	0.66253	0.19337	0.48537	-4.3213	0.21698	-1.8308	-0.26754	0.97123	-0.76585	1.5116	1.7824	2.2773	0.24945	1.2783	1.3728	2.2655	1.2133	0.0095765	1.7292	1.6543	1.2064	0.74373	1.1583	1.3156	0.24104	1.6332	3.0852	1.7911	1.6411	1.106	0.92342	1.6084
CFAP45	0.0067533	0.12782	1.19985	2.29716		-3.1243	-0.25374	-0.3513	0.40166	-1.9018	-3.1762	-1.1315	-2.154	-3.0306	-2.0183	-1.3229	-2.7609	-1.945	-1.2675	-1.0288	1.8191	0.77466	0.78244	-2.7425	0.24945	-0.043625	-2.0139	-0.90447	-1.1086	0.0095765	-2.2678	-0.66759	-3.3443	-1.7854	-0.84172	1.3156	-0.75896	-0.68872	-0.82165	0.20614	1.3191	-0.89399	0.33846	0.023416
SNORD79	0.00692722	0.129737	1.61092	3.05446		2.7717	1.0682	-3.8157	1.4017	0.91633	1.7014	-1.1315	3.3995	3.3633	2.3598	-1.3229	-0.78303	1.0946	2.4329	3.2192	3.5561	3.4376	2.6893	3.3477	4.4974	3.4158	2.8582	2.555	2.9788	3.3315	1.9923	2.5023	1.5283	3.0657	2.8587	3.708	2.0484	1.6332	2.9857	2.6656	2.7786	0.69097	-0.66154	-2.1851
COL4A3	0.00693962	0.129737	-1.37512	0.38552		0.89726	-0.25374	-1.3513	0.40166	-2.4121	-0.1059	0.45344	0.077566	0.77833	-0.099597	0.67708	0.21698	0.35763	-1.2675	-1.0288	-4.4876	1.1897	-2.4055	0.95539	-2.4778	-1.0436	-3.0094	0.095533	-2.9539	-2.1546	-2.8855	-0.66759	-2.4663	0.15877	-1.6481	-3.4374	1.241	0.31128	0.17835	0.20614	-2.421	-0.89399	-3.6089	-1.9572
DTL	0.0070845	0.130479	1.33859	2.52904		-0.68771	-0.25374	-3.9646	-3.4219	-1.2929	-0.1059	-2.6403	-0.92243	-3.0522	-0.099597	-0.32292	-0.78303	0.35763	-0.26754	-1.0288	0.23415	-2.447	-0.21756	0.54036	0.24945	-1.0436	1.0509	1.0955	-2.5686	0.0095765	0.99226	1.6543	0.79135	0.74373	1.7432	2.3156	0.826	-2.3872	0.17835	-0.79386	-2.0363	0.10601	1.6604	-0.97659
SCARNA4	0.00735453	0.131363	1.25885	2.39305		2.7717	-1.2537	-0.3513	0.40166	2.3314	-0.1059	1.4534	1.6625	0.77833	2.0703	-0.32292	-0.78303	-2.0053	1.5398	2.6717	1.8191	3.2772	1.1044	2.5403	4.0568	3.0438	1.6358	2.4175	1.8914	2.1795	0.99226	2.6543	2.0137	1.4807	2.1583	1.3156	1.826	0.89625	1.9857	0.7911	1.6411	1.106	-2.8447	1.8308
FIRRE	0.00742175	0.131871	1.11803	2.17051		-0.68771	-1.2537	-1.3513	-2.3914	0.91633	-2.1813	-2.6406	-0.92243	-2.4168	-3.0461	-2.977	-0.78303	-2.3329	0.31743	-1.0288	-0.76585	-0.81031	1.1044	1.2773	-0.75055	-0.043625	-2.5125	-1.4833	-0.10863	0.0095765	-0.59271	-0.66759	-2.7845	-0.84123	-0.84172	-2.7744	-0.75896	-2.5224	-0.82165	0.7911	0.9041	-0.89399	0.92342	0.60838
LOC101927021	0.00793846	0.135641	-1.11565	0.461483		1.3123	0.74626	0.23366	2.2761	-0.66864	0.8941	-0.13152	0.077566	-0.80663	0.48537	0.99901	1.217	1.0946	-1.2675	-2.9388	1.2342	-1.4568	-1.2176	-0.044608	0.24945	-0.043625	0.63584	-0.90447	-2.97	0.59454	-0.59271	-2.9665	0.20639	1.1588	0.15828	-0.68435	1.241	-2.1859	0.17835	0.20614	-2.1915	0.69097	-0.66154	0.023416
AICDA	0.00794559	0.135641	-1.14763	0.451366		-0.68771	-1.2537	1.4561	1.1386	-1.7914	-1.1059	0.45344	-0.92243	-1.5537	-3.255	-0.32292	0.21698	-1.2273	-3.0503	-1.0288	-2.7603	-2.1986	-3.8505	-2.3607	-2.9913	-1.0436	-0.94912	-2.8005	-1.1086	-2.1085	-3.6579	-0.66759	-0.79361	-0.84123	-0.84172	-2.1961	-3.0899	0.89625	-0.82165	-1.872	-2.7424	-3.0315	-0.66154	-0.97659
MST1L	0.00795664	0.135641	-1.16879	0.444795		-0.68771	-0.25374	-0.3513	-1.1833	-2.6992	-1.1059	-3.0902	0.077566	1.1934	-1.0996	-1.3229	-0.78303	0.77266	-4.0704	-1.6697	-3.4612	-0.81031	-1.2176	-3.0909	0.83442	-1.0436	-2.5132	-0.90447	-2.7005	-2.0103	0.40729	-3.0457	-2.2774	-1.6753	-1.2121	-2.7503	-3.3414	-2.4348	-2.9881	-0.79386	-3.8048	-1.9181	-0.66154	-2.3011
NEIL3	0.00805257	0.136153	1.12692	2.18391		-0.68771	-0.25374	-3.3416	0.40166	-2.5147	-2.5017	-1.1315	0.66253	-0.80663	-0.099597	-0.32292	-0.78303	-2.0474	0.73247	-1.0288	0.23415	0.18969	-1.2176	-0.044608	2.2494	0.54134	1.0509	0.6805	1.4763	0.59454	-1.9601	-0.66759	-0.79361	0.15877	1.1583	0.90061	0.24104	0.31128	0.17835	1.2061	0.31913	-3.4253	0.33846	-0.97659
FAM151B	0.00834545	0.13821	1.26383	2.40133		-1.4507	-2.8274	-3.3556	-1.1833	-0.66864	0.8941	-0.13152	-1.6587	0.19337	-2.2026	-1.2481	-2.591	-1.2273	-0.26754	-1.0288	1.2342	0.18969	0.3674	-0.044608	1.2494	-1.0436	1.0509	-0.90447	1.6987	0.59454	0.99226	0.33241	0.79135	-2.6383	-2.6071	-0.68435	-2.9005	-0.68872	-2.666	0.7911	0.9041	1.691	0.92342	0.60838
LOC100996583	0.00855363	0.139831	1.08714	2.12453		-0.68771	-2.9592	-3.816	-1.1833	-2.7998	-0.1059	-3.0645	-0.92243	-0.80663	-2.6171	-1.3229	-3.5811	-2.1883	-1.2675	-1.0288	-2.8767	0.18969	-0.21756	-0.044608	0.24945	-1.0436	-0.94912	-2.8088	-1.1086	0.0095765	0.40729	-2.8799	-0.79361	-0.84123	-0.84172	-2.6422	0.24104	0.31128	-1.7533	-2.9421	0.31913	0.10601	-0.66154	-0.97659
SUMO4	0.00861137	0.139831	-1.10855	0.463759		1.6342	0.74626	-2.1023	1.4017	2.1387	1.8941	1.1904	1.3995	0.77833	1.2223	0.67708	1.5389	-0.22734	-0.26754	1.2932	-0.76585	-0.81031	0.3674	0.54036	1.2494	-1.3789	0.050876	-3.2837	0.89137	0.0095765	-0.59271	0.33241	0.20639	-0.84123	0.74324	-0.68435	-2.1611	1.3113	0.76332	0.20614	-2.8859	1.106	0.33846	0.023416
CRADD	0.00866851	0.139954	1.28727	2.44067		-3.4276	-1.9108	-0.3513	1.4017	-2.4754	-2.8885	1.1904	-1.6602	0.77833	0.48537	-3.6111	-0.78303	-3.4558	-0.26754	-1.0288	0.81911	0.18969	-0.21756	0.54036	0.24945	1.2783	0.050876	0.6805	-1.1086	0.0095765	-1.9918	-0.66759	0.20639	1.4807	1.4802	-0.68435	0.826	-0.68872	-3.266	0.20614	0.9041	0.10601	0.33846	0.60838
COL24A1	0.00905961	0.142403	1.33145	2.51655		0.31229	-1.2537	-4.3567	-1.1833	-2.5763	-3.1971	-1.1315	-3.051	-3.1299	-1.0996	-3.0424	0.21698	-2.2862	-1.2675	-0.028771	1.2342	1.1897	0.78244	0.54036	-2.9099	-1.0436	0.050876	0.095533	-1.1086	-2.6349	-3.0774	-0.66759	-3.6228	0.15877	0.74324	0.90061	-2.2921	-0.68872	-0.82165	-0.79386	-2.3154	-0.89399	0.92342	0.60838
FLJ42627	0.00908647	0.142403	1.11707	2.16906		-0.68771	-1.2537	-3.5634	0.40166	0.91633	-1.1059	-0.13152	1.0776	0.19337	1.7078	0.26204	-0.78303	-1.818	-0.26754	0.97123	0.81911	0.77466	-0.21756	-0.044608	0.83442	-1.0436	0.050876	1.0955	-0.10863	1.0096	0.99226	1.9174	1.2064	1.9661	2.7432	0.31565	1.563	2.1186	-0.82165	-0.79386	3.0196	0.69097	-0.66154	1.3453
ARRDC4	0.00989256	0.148372	1.08281	2.11816		1.8973	1.7463	1.8186	2.624	2.7908	1.7014	1.4534	2.0776	-3.7576	2.6008	-0.32292	0.21698	2.3576	2.0544	-0.028771	2.8191	2.9971	2.4829	1.9554	2.9499	2.2783	2.9578	3.796	3.0613	1.8169	2.4073	1.9174	2.9068	1.7437	2.6177	2.123	2.241	3.0117	2.3483	2.3761	3.0196	1.4279	2.7979	2.4829
ZHX1-C8orf76	0.0103364	0.150526	-1.20108	0.434948		-0.68771	-0.25374	0.6487	0.8167	-0.66864	1.4791	1.1904	-0.92243	0.77833	0.48537	0.26204	0.80194	0.35763	0.31743	-0.028771	0.81911	-0.81031	-3.2901	-0.044608	0.24945	-1.0436	-3.2605	0.6805	-2.1181	-0.99042	-2.0811	0.33241	0.20639	-0.84123	-2.672	0.90061	0.24104	0.31128	-0.82165	-3.5265	-2.4506	-3.4153	-0.66154	1.3453
RAI14	0.0103684	0.15055	-1.32048	0.400401		1.3123	-0.57045	-3.0079	-1.1833	0.91633	-0.1059	-0.13152	-0.92243	0.77833	-0.099597	-0.32292	0.21698	0.35763	-3.7192	-3.3147	-3.3577	-4.1349	-1.2176	-0.044608	-2.7427	-1.0436	-3.0907	0.095533	-1.8707	0.0095765	0.40729	-2.453	0.79135	-2.2332	-0.84172	-2.575	-0.95159	-0.68872	-3.3001	-0.79386	-1.6469	1.106	0.92342	-3.1701
ELANE	0.0107229	0.152699	1.6269	3.08848		0.89726	2.9942	-3.4546	1.1386	0.33136	2.216	-2.3903	1.0776	2.0007	1.4854	0.26204	-2.6549	-2.9697	0.73247	0.55619	1.5561	4.319	2.3674	2.6558	0.83442	2.1263	3.2208	1.0955	3.7983	2.3315	0.99226	0.91737	4.4918	0.15877	2.3282	0.90061	-0.75896	1.3113	0.17835	0.20614	-0.68087	1.9134	5.2692	1.3453
CKS2	0.0110787	0.154765	1.09108	2.13034		0.89726	-1.2537	-2.828	-0.1833	0.91633	-2.576	0.86847	-3.7086	1.1934	-0.099597	-2.4901	-0.78303	0.35763	0.31743	0.97123	-0.76585	0.77466	-1.2176	0.95539	0.83442	0.54134	1.0509	1.0955	0.89137	-0.99042	0.40729	-0.66759	-0.79361	1.4807	0.15828	1.9006	1.241	-0.68872	1.1783	0.20614	-0.68087	0.10601	-0.66154	1.3453
UBXN11	0.0110846	0.154765	1.02742	2.03838		0.89726	2.0682	1.9706	0.40166	2.1387	-2.7017	0.45344	-0.92243	-2.1716	1.4854	2.7645	1.5389	0.35763	2.4329	-0.028771	1.8191	1.1897	1.5898	2.1253	0.83442	1.9564	1.0509	2.2655	2.8914	1.5945	0.99226	0.33241	1.2064	1.4807	1.7432	1.3156	2.7005	2.4812	1.1783	2.2061	1.3191	2.106	1.6604	2.8308
LOC100129534	0.0113262	0.156702	-1.03491	0.488047		-1.9698	-1.2537	-1.3513	-2.2869	0.33136	0.47906	-2.963	0.077566	-0.80663	-0.099597	-1.3229	-0.78303	-0.22734	-2.7419	-2.4121	-2.7925	-1.9424	-2.9865	-0.044608	-2.8832	-2.5897	-0.94912	-2.2478	-1.5716	-0.99042	-0.59271	-0.66759	-2.5997	-0.84123	-3.0412	0.31565	-2.5152	-2.6386	-4.3534	-3.9685	-2.0141	-0.89399	-0.66154	-2.6361
EGLN3	0.0116585	0.158399	1.20071	2.29852		-2.2302	1.3312	-1.3513	-1.1833	0.91633	0.8941	-2.9718	-0.92243	-0.80663	-1.0996	-2.7723	-2.2812	-3.5599	0.73247	-1.0288	-0.76585	1.5116	0.3674	-2.3585	-0.75055	1.2783	1.0509	0.095533	0.47633	-0.99042	0.40729	-2.3864	-0.79361	-0.84123	0.74324	0.90061	0.826	-0.68872	0.17835	0.7911	1.9041	0.10601	-2.6442	1.0234
SNORD68	0.0121297	0.160585	1.30833	2.47654		-2.105	-2.5787	-3.0656	-3.5922	1.6533	1.7014	-1.1315	1.6625	1.1934	0.9004	0.26204	0.21698	-1.2273	1.5398	0.97123	1.5561	1.5116	1.1044	1.5403	2.2494	2.4158	2.5103	0.095533	1.2133	0.59454	0.40729	0.91737	0.20639	0.74373	1.4802	0.90061	0.826	-1.2783	1.5003	0.7911	1.6411	0.10601	-0.66154	-3.0866
CACNA2D2	0.0121843	0.160904	-1.21777	0.429947		1.6342	3.0682	2.5556	1.9866	1.9163	1.7014	2.1904	1.6625	2.1934	1.9004	1.999	1.217	0.77266	1.0544	2.1411	-2.2913	-0.81031	1.9524	1.7628	-2.7297	2.1263	-3.7993	0.6805	1.4763	1.0096	1.4073	2.1398	1.5283	1.4807	2.6177	-0.68435	2.0484	1.8963	0.17835	0.20614	0.9041	0.10601	0.92342	0.60838
ZNF836	0.0126647	0.162153	-1.24586	0.421655		1.3123	-0.25374	0.6487	1.8167	0.33136	1.4791	1.6758	0.66253	1.1934	1.2223	0.99901	1.8019	1.0946	-0.26754	-3.1366	-2.0762	-3.1977	1.1044	1.5403	-0.75055	-1.0436	-2.7362	0.6805	-1.9016	2.0096	0.99226	-0.66759	0.79135	1.1588	0.74324	0.31565	1.563	0.89625	1.5003	1.2061	0.31913	-3.4147	-0.66154	0.60838
CEP170B	0.0129255	0.163773	-1.14853	0.451085		-0.68771	2.0682	-0.3513	-1.1833	-0.66864	-0.1059	-1.1315	0.077566	1.7783	0.9004	-0.32292	1.5389	0.77266	0.31743	-2.8307	-0.76585	0.18969	-2.5915	-2.3496	-1.9212	-1.0436	-3.1333	0.6805	-0.10863	-0.99042	0.99226	1.3324	-0.79361	0.74373	-0.84172	-0.68435	-2.5476	-0.68872	-0.82165	-3.6032	-1.4912	0.69097	-2.2558	0.023416
SNORD87	0.0130253	0.163811	1.22341	2.33498		0.89726	1.0682	-3.0419	-0.1833	1.3314	0.47906	-0.13152	2.537	2.8938	1.9004	-0.32292	-3.4502	1.3576	0.73247	2.4307	1.8191	3.0966	1.9524	1.7628	3.8344	2.6568	1.8582	2.796	1.8914	1.8169	0.40729	1.9174	0.20639	1.9661	1.4802	0.31565	2.563	0.89625	0.17835	1.5281	2.3191	2.106	-0.66154	0.60838
CD109	0.0148813	0.175065	1.16159	2.23703		0.89726	-2.3828	-0.3513	-1.6861	-2.434	0.47906	-2.6822	-2.8094	-3.2956	-1.0996	-0.32292	0.21698	-2.3992	-1.2675	-1.0288	-2.707	0.77466	0.3674	0.54036	-0.75055	0.95638	0.050876	0.6805	0.89137	-0.99042	-0.59271	-0.66759	0.20639	-1.9468	0.15828	0.90061	0.24104	-2.8189	0.17835	2.0135	1.9041	-2.5788	-0.66154	0.60838
AMOT	0.015062	0.175685	-1.075	0.47467		0.89726	1.9162	1.4561	1.8167	2.1387	2.3535	1.4534	1.0776	0.77833	0.9004	-0.32292	1.217	2.4731	0.31743	1.7786	-3.1877	-0.81031	2.2419	-1.0446	1.2494	0.95638	-2.4938	0.6805	-0.10863	1.8169	0.99226	0.91737	-2.2852	1.7437	-0.84172	-0.68435	0.826	1.6332	1.5003	0.20614	1.3191	0.69097	0.92342	0.023416
PINLYP	0.0152099	0.176374	-1.12688	0.457906		-0.68771	-1.2537	0.23366	-0.1833	-0.66864	0.8941	0.45344	0.077566	1.1934	-1.0996	-0.32292	-3.0603	-1.2273	-1.2675	-0.028771	-0.76585	-1.5201	-1.2176	-1.0446	-0.75055	-1.7613	-3.0709	1.6805	-1.1086	-2.1499	0.40729	-3.093	-0.79361	-3.0318	-3.2108	-1.9694	-0.75896	-3.5077	0.17835	-3.8683	-0.72435	-2.9822	-3.2652	-0.97659
TFPI	0.0152492	0.176374	1.31527	2.48849		-0.68771	2.0682	-3.5251	-3.1223	0.91633	-0.1059	-1.1315	-0.92243	-3.109	-3.4157	-0.32292	0.80194	-0.22734	2.1919	-1.0288	0.23415	2.8901	0.3674	-0.044608	-0.75055	0.95638	2.3728	-3.1616	0.47633	0.0095765	0.99226	0.33241	-0.79361	0.74373	0.15828	-0.68435	0.24104	-1.9511	1.5003	0.20614	2.3191	1.106	0.92342	-0.97659
MYLPF	0.0154652	0.177333	-1.0073	0.497475		0.31229	0.33122	-1.3513	-0.1833	1.6533	1.7014	0.86847	0.077566	1.1934	-0.099597	0.99901	2.217	1.3576	0.31743	0.97123	-2.0734	1.1897	-0.21756	0.54036	0.24945	-1.0436	1.8582	-0.90447	-0.10863	1.3315	-0.59271	-2.0419	1.2064	1.1588	0.15828	-3.1314	-0.75896	-0.68872	-0.82165	-0.79386	0.31913	-2.5213	-0.66154	-0.97659
ID2-AS1	0.01573	0.179101	1.13111	2.19028		-2.8632	-2.1571	-1.3513	-0.1833	-0.66864	-2.5427	-2.2121	-0.92243	-2.6774	-2.2941	-0.32292	1.217	-3.143	-0.26754	-1.0288	0.81911	-2.6808	1.1044	0.95539	-0.75055	0.95638	-0.94912	-2.4058	0.47633	-0.99042	0.99226	-0.66759	-0.79361	-0.84123	-3.4416	-0.68435	-2.7037	1.3113	0.17835	-0.79386	0.31913	0.10601	-0.66154	1.6084
RNF139-AS1	0.016043	0.181063	1.26956	2.41088		-1.9453	-2.9211	-1.3513	0.40166	-0.66864	-1.1059	-3.4201	-0.92243	-3.8269	0.48537	-1.3229	1.5389	-2.5216	0.31743	-1.0288	-0.76585	1.1897	-2.5598	0.54036	1.5714	-3.5456	-2.5145	0.6805	-0.10863	1.0096	-0.59271	0.91737	0.20639	1.9661	-0.84172	-2.3049	-1.5259	1.3113	0.76332	0.7911	0.9041	0.10601	0.33846	1.0234
SNORA16A	0.0170947	0.186376	1.01192	2.01659		1.6342	1.3312	-3.1561	1.8167	-0.66864	-1.1059	-0.13152	1.0776	-0.80663	1.7078	-1.3229	-0.78303	0.35763	-0.26754	1.7786	2.4041	1.9971	1.1044	1.7628	3.4974	0.95638	1.3728	1.0955	1.4763	1.5945	0.99226	1.6543	0.20639	1.4807	-0.84172	1.6376	-0.75896	0.31128	1.1783	0.20614	-0.68087	0.69097	1.3385	0.023416
TSPAN13	0.0171254	0.186376	1.11175	2.16107		1.8973	0.33122	-0.3513	-1.1833	0.33136	0.8941	1.4534	0.077566	-0.80663	1.4854	-3.7613	-2.702	1.7727	1.3174	1.5562	0.23415	2.3596	-0.21756	1.5403	2.2494	2.1263	2.2208	1.6805	1.4763	0.0095765	1.4073	0.91737	0.20639	0.74373	-1.714	1.3156	0.826	-0.68872	2.1783	2.6656	0.31913	0.69097	0.33846	2.0234
CDT1	0.0176331	0.189209	1.00395	2.00549		0.89726	-2.3369	-1.3513	-2.7384	-2.4859	-2.3534	-0.13152	0.077566	-2.1973	-0.099597	-1.3229	-2.9324	-1.2273	-1.2675	-1.0288	1.2342	0.18969	-2.1948	0.54036	-0.75055	-0.043625	-0.94912	0.095533	0.47633	1.5945	-1.7539	0.33241	0.20639	1.1588	-0.84172	-0.68435	-0.75896	-3.3492	-0.82165	0.20614	-0.68087	0.69097	0.33846	-2.2401
SNORA32	0.0181205	0.190191	1.05795	2.08197		2.1196	0.74626	-1.3513	0.40166	-0.66864	0.8941	-1.1315	1.0776	0.77833	-0.099597	-0.32292	0.21698	-0.22734	1.7325	3.0587	2.4041	2.8901	-1.2176	0.95539	3.4194	2.5413	1.0509	1.6805	1.2133	1.3315	1.4073	2.1398	-0.79361	1.1588	1.7432	1.6376	2.0484	-2.2046	0.76332	0.7911	1.9041	1.4279	0.92342	-1.6336
SEMA4F	0.0181371	0.190191	-1.11576	0.461449		1.3123	1.0682	0.23366	-1.7037	1.3314	0.47906	1.1904	0.077566	0.77833	1.4854	-0.32292	0.80194	0.77266	0.73247	0.55619	0.81911	-0.81031	0.3674	-3.5376	0.24945	-1.0436	-3.2049	-0.90447	-0.10863	-0.99042	-0.59271	0.91737	0.79135	-0.84123	1.1583	0.31565	0.826	0.89625	0.17835	-3.5334	-0.68087	-0.89399	-0.66154	-4.0053
LOC101928103	0.0184405	0.191621	-1.04724	0.483892		-0.68771	-1.2537	2.1081	-0.1833	-0.66864	-1.1059	-3.5658	-2.8754	0.19337	-1.0996	0.26204	-1.3472	-0.22734	-0.26754	-2.5865	-0.76585	-2.3329	-1.9706	-1.0446	-3.4218	-2.8824	0.050876	-1.5056	-0.10863	-0.99042	-2.5952	-3.38	0.20639	-0.84123	-0.84172	-2.4653	-2.2472	-2.5213	-2.3067	-3.2128	-2.8601	-3.6106	-2.6522	-0.97659
DDX11	0.0185781	0.192183	1.16317	2.23949		0.89726	-2.2855	-1.3513	-1.1833	-2.4496	-1.1059	-0.13152	-2.8503	0.19337	-1.0996	-3.6433	-0.78303	-0.22734	1.5398	-0.028771	-4.1892	-0.81031	-1.2176	-1.0446	-0.75055	-1.0436	0.63584	0.095533	0.89137	1.8169	1.4073	-2.7395	0.79135	2.4807	0.74324	0.31565	-0.75896	-0.68872	1.7633	-0.79386	-0.68087	0.10601	0.33846	0.023416
RN7SK	0.0187563	0.192603	1.17161	2.25263		-0.68771	-1.2537	-3.4658	-2.8964	-2.1536	0.8941	-1.1315	-3.0535	1.5153	-0.099597	-1.3229	-2.8282	-3.1443	-1.2675	-1.0288	-0.76585	-2.7993	-0.21756	-0.044608	1.2494	1.5413	-0.94912	1.4175	-0.10863	0.0095765	0.40729	0.33241	0.79135	0.15877	-0.84172	0.90061	-2.1582	0.89625	-2.7394	-0.79386	1.6411	-0.89399	-2.5541	-0.97659
GRIN2D	0.0192324	0.19492	1.01107	2.01541		-1.8684	-2.5283	-3.5335	-1.1833	-3.0262	1.216	-1.1315	-0.92243	-2.307	-1.0996	-2.946	-0.78303	-3.1051	-0.26754	-1.0288	0.23415	0.18969	-0.21756	-1.0446	0.83442	-1.0436	0.050876	0.6805	-1.1086	-0.99042	-1.3109	-3.3652	-0.79361	-0.84123	-0.84172	0.31565	0.24104	-2.8923	-2.068	0.7911	-3.2336	0.10601	-0.66154	-1.883
BLNK	0.0193781	0.19492	1.02731	2.03822		3.4822	1.9162	-3.3586	1.1386	0.91633	2.064	2.7754	1.8849	2.0007	2.9879	0.67708	0.80194	1.9426	1.7325	3.0587	2.6936	3.3596	-1.2176	3.7627	2.9499	2.5413	2.0509	2.9029	2.2133	1.0096	2.4073	2.6543	3.1133	2.3287	2.6177	3.123	3.0484	2.7707	2.6378	2.3761	3.4891	2.106	2.5084	2.9303
LOC102724699	0.0210829	0.201865	1.04944	2.06973		-0.68771	-1.2537	-1.3513	0.8167	-3.7233	-2.029	-3.8005	-0.92243	1.1934	-1.0996	-3.3509	0.21698	-3.0682	0.31743	0.55619	0.23415	-0.81031	-0.21756	-1.0446	1.2494	0.54134	1.0509	-2.9623	0.47633	-0.99042	-0.59271	0.33241	0.20639	-0.84123	-0.84172	-0.68435	-0.75896	-0.68872	-2.6989	0.20614	0.9041	-0.89399	-1.906	-0.97659
SNORA31	0.0212733	0.20242	1.06361	2.09016		2.4822	1.5536	-3.3216	1.8167	2.3314	1.8941	-0.13152	2.3995	2.1934	1.9004	0.99901	-2.6443	1.9426	2.8199	2.1411	2.5561	3.0966	2.3674	2.2773	3.4974	3.0438	1.8582	2.2655	2.3508	3.3315	1.9923	1.9174	0.79135	2.6182	0.74324	1.3156	2.9415	1.8963	2.5003	2.2061	1.9041	0.69097	1.3385	0.023416
NDUFB2-AS1	0.02328	0.210347	-1.02899	0.490053		0.31229	0.74626	0.97062	1.9866	-0.66864	0.47906	0.86847	0.66253	1.7783	0.9004	0.67708	1.217	1.0946	-0.26754	1.2932	1.2342	-0.81031	0.3674	-0.044608	-2.6072	-1.0436	1.0509	0.095533	1.2133	1.3315	0.40729	1.3324	1.2064	-0.84123	0.74324	-2.7338	-1.7789	-3.8875	-2.7133	0.20614	-0.68087	0.69097	0.92342	0.60838
GPR35	0.0237841	0.211764	-1.20998	0.432274		-3.0485	1.3312	0.97062	2.4017	1.3314	1.4791	0.86847	1.6625	0.19337	-0.099597	-0.32292	2.0243	1.7727	0.73247	-1.0288	-3.999	-1.841	-0.21756	-2.5062	0.83442	-0.043625	-0.94912	1.9029	0.89137	1.5945	-2.4772	0.91737	0.20639	0.15877	-0.84172	0.31565	-1.5225	-3.0022	-1.6778	1.5281	1.6411	-0.89399	-0.66154	0.60838
PLA2G4C	0.0239551	0.21251	-1.05889	0.480001		-0.68771	0.74626	0.23366	1.4017	1.9163	0.8941	-2.0953	1.3995	0.19337	1.9004	0.26204	0.21698	1.3576	-1.2675	-1.0288	-3.1128	-0.81031	-1.2176	0.54036	-2.4197	0.54134	-3.0216	1.6805	0.47633	1.3315	1.7292	-0.66759	-0.79361	0.15877	-2.1904	-0.68435	-2.9498	0.31128	0.76332	0.20614	0.9041	0.10601	0.33846	-0.97659
ZDHHC13	0.0243676	0.212946	-1.02427	0.491658		0.89726	1.0682	-0.3513	0.40166	0.33136	1.216	0.45344	0.077566	0.19337	-0.099597	0.67708	-0.78303	-0.22734	-1.2675	-1.0288	0.23415	-0.81031	-0.21756	-2.7486	0.83442	-3.8814	0.050876	-0.90447	-0.10863	-2.4068	-2.6246	-3.9847	0.20639	1.4807	0.15828	0.31565	-2.6085	1.6332	-0.82165	0.7911	0.31913	0.10601	-0.66154	-0.97659
SPSB1	0.025716	0.215745	1.06177	2.08749		-2.4923	0.33122	-2.5105	-3.3263	-2.0337	-1.1059	-1.1315	-0.92243	-0.80663	-1.0996	-3.0417	-3.2334	-0.22734	-1.7967	-0.028771	-0.76585	0.18969	-2.7826	-1.0446	-2.9099	-1.0436	1.3728	-0.90447	0.89137	-0.99042	1.4073	-2.4948	0.20639	-0.84123	0.15828	0.31565	-0.75896	0.31128	-2.9558	0.7911	2.3191	-2.6013	-0.66154	-0.97659
RALGPS1	0.0258163	0.215745	-1.00241	0.499167		-0.68771	1.5536	0.6487	0.8167	0.33136	0.8941	1.1904	-0.92243	0.19337	1.7078	0.67708	0.80194	1.9426	0.31743	0.55619	-1.8229	-0.81031	-1.2176	0.95539	-1.8435	-2.1695	-0.94912	1.4175	1.6987	0.59454	1.4073	0.33241	-0.79361	-2.3672	-0.84172	0.31565	1.241	1.3113	-2.8784	-3.178	-0.68087	0.10601	0.92342	0.60838
ZNF814	0.0261429	0.21615	1.0331	2.04642		0.31229	0.74626	-0.3513	-0.1833	-2.3065	1.216	-3.9667	-2.3211	-2.3521	-2.8467	0.26204	1.217	-1.2273	0.31743	-1.0288	-0.76585	0.77466	1.3674	-0.044608	2.0568	0.54134	-0.94912	0.6805	1.2133	1.3315	0.40729	-0.66759	-0.79361	-0.84123	1.4802	1.3156	-0.75896	-1.3655	0.76332	1.2061	-2.0352	-0.89399	-0.66154	0.60838
LOC101928307	0.0262926	0.216687	1.02961	2.04147		-3.0222	-0.25374	-3.1374	-3.6846	-0.66864	-1.1059	-3.3158	-2.2774	-0.80663	-0.099597	0.99901	-2.0078	-2.0043	1.3174	-1.0288	0.23415	-0.81031	-1.2176	0.54036	-0.75055	-3.3098	2.2208	0.095533	0.47633	-0.99042	-2.1869	-0.66759	-0.79361	-1.2849	-2.776	0.31565	-0.8985	-0.68872	-0.82165	-0.79386	-0.68087	0.69097	0.33846	-2.5298
HLA-DRB5	0.0270418	0.219888	2.26218	4.79716		3.4822	5.7686	3.8582	4.8828	-3.1508	8.7798	7.6066	0.66253	1.1934	3.1483	4.925	0.80194	1.9426	-0.26754	7.6366	4.9066	8.482	3.3674	7.74	7.5256	8.2464	4.7513	8.1123	7.3426	-0.99042	7.9348	2.9174	4.9613	7.1418	7.6779	7.5055	7.5264	8.0048	1.5003	5.2505	4.7115	2.106	4.9234	7.6046
TVP23C	0.0271099	0.220026	1.01547	2.02156		-0.68771	0.74626	-0.3513	-1.1833	1.3314	-3.0468	-3.8985	-0.92243	0.19337	-2.8571	-0.32292	0.21698	1.3576	1.0544	0.55619	1.2342	0.18969	-2.8165	0.54036	0.83442	-1.0436	-0.94912	0.095533	1.4763	0.0095765	0.99226	0.91737	0.20639	1.1588	-1.7562	1.3156	-0.75896	0.89625	0.76332	1.5281	0.31913	1.4279	0.33846	-0.97659
SNORA75	0.0272748	0.220459	1.14404	2.20999		1.3123	-1.2537	-3.469	-0.1833	0.33136	-1.1059	-2.5026	0.66253	1.1934	-0.099597	-2.9988	0.21698	-3.8802	0.73247	2.2932	-0.76585	1.5116	-0.21756	0.95539	2.5714	1.9564	1.3728	0.095533	-0.10863	0.59454	-0.59271	1.6543	0.20639	-0.84123	0.15828	-2.8953	0.826	-2.4865	0.17835	-0.79386	0.31913	0.10601	-0.66154	0.023416
HIST1H2BF	0.0275727	0.221512	1.03159	2.04428		1.6342	0.74626	-2.3558	-2.1589	-2.319	-1.7454	-1.1315	-0.92243	-2.191	-3.3156	-3.1292	-2.0598	-3.1499	-0.26754	0.55619	0.81911	-0.81031	-2.2459	0.54036	0.24945	0.95638	-2.586	-2.6955	-1.1086	-0.99042	0.40729	-2.6753	0.20639	0.74373	-0.84172	0.31565	-3.0755	-0.68872	0.17835	-0.79386	0.31913	-0.89399	-0.66154	-2.3318
RPS26	0.0294886	0.229366	1.05931	2.08393		0.31229	-1.7258	-3.6628	-1.1833	0.33136	-1.1059	-0.13152	0.66253	-0.80663	1.7078	-0.32292	-3.1597	0.35763	1.0544	0.55619	0.81911	1.1897	0.3674	-0.044608	0.24945	-1.0436	1.0509	1.0955	0.47633	1.5945	0.99226	1.9174	0.20639	-3.1582	1.1583	0.90061	2.0484	0.89625	-3.4017	1.2061	-0.68087	0.69097	-0.66154	0.60838
SRGAP2B	0.0297833	0.229651	1.13915	2.20252		-1.2774	-3.8595	-0.3513	-1.1833	2.1387	-2.8286	-0.13152	-2.1962	-0.80663	-1.0996	-3.3923	-2.1396	-0.22734	-0.26754	0.55619	1.2342	-2.7864	-0.21756	0.54036	0.24945	0.95638	-0.94912	1.6805	1.2133	0.59454	-2.9058	0.33241	-0.79361	0.15877	0.15828	1.9006	-2.6812	-2.6767	-2.6593	0.20614	0.31913	0.10601	-0.38365	1.0234
ASB13	0.030253	0.231039	1.16117	2.23638		1.8973	-3.4684	-4.6361	0.8167	1.6533	1.7014	1.1904	1.6625	0.19337	1.9004	-2.7192	-2.4417	-0.22734	1.3174	0.97123	2.2341	0.77466	1.1044	1.5403	0.83442	-0.043625	2.0509	1.0955	0.89137	0.0095765	1.9923	1.3324	1.5283	1.1588	1.1583	-0.68435	0.826	0.31128	1.5003	1.5281	0.31913	1.4279	-1.9665	2.0234
DEFA4	0.0305979	0.232228	1.52463	2.87713		-0.68771	0.33122	-3.7401	-0.1833	-2.1168	2.4791	0.86847	1.6625	-2.7039	-2.5387	-1.3229	-2.4233	-1.8937	-1.2675	1.2932	2.2341	2.8901	-1.2176	1.7628	1.8344	1.2783	1.0509	-0.90447	2.9788	-0.99042	0.99226	-0.66759	3.4543	0.15877	0.74324	1.6376	-3.0729	0.31128	-2.4007	-2.2672	-2.9705	1.4279	4.9823	1.8308
DOCK1	0.0312468	0.234898	1.12045	2.17414		-3.3647	-0.25374	-2.7657	-0.1833	-0.66864	1.4791	-1.1315	0.077566	0.19337	1.7078	-2.955	-2.0179	-4.0138	0.73247	0.55619	0.81911	1.5116	0.3674	-1.0446	-0.75055	1.2783	-0.94912	-0.90447	1.2133	0.59454	-0.59271	0.91737	0.20639	-0.84123	0.15828	0.31565	-0.75896	0.89625	-3.302	2.2061	0.9041	-0.89399	1.3385	-2.6392
SNORD50B	0.0335001	0.242766	1.0553	2.07816		4.3567	2.9942	-0.3513	2.7236	2.3314	3.3535	-1.1315	4.3255	4.0514	4.258	0.67708	3.0243	1.7727	3.9024	4.4631	4.2341	4.3991	3.9919	4.3477	5.4974	4.4799	3.8058	4.4175	3.2133	4.3671	3.7292	3.7918	3.7299	4.3682	3.0652	3.7751	3.0484	0.31128	3.7633	2.7911	3.6411	2.8064	1.6604	0.60838
UBQLN4	0.0370915	0.253345	-1.01717	0.494084		0.89726	0.74626	0.23366	-0.1833	-0.66864	-0.1059	0.86847	1.3995	-2.2622	0.9004	-0.32292	0.21698	-2.7586	-1.2675	0.97123	-0.76585	-0.81031	-1.2176	-1.0446	0.83442	0.54134	-3.1835	-2.6916	-0.10863	0.59454	0.40729	-0.66759	-0.79361	0.15877	0.15828	-2.6535	-2.9213	-1.1565	-3.0154	-3.9427	-2.1557	-0.89399	0.33846	-3.239
MME	0.0406257	0.264361	1.0614	2.08696		-0.68771	-1.2537	-2.5653	-1.1833	-2.6002	-2.3664	-1.1315	-2.1996	-0.80663	-2.6023	-0.32292	-2.3805	-1.2273	-1.2675	-3.3079	1.8191	0.18969	0.3674	1.7628	0.24945	0.95638	1.0509	-3.2557	-1.1086	0.0095765	1.4073	0.91737	-0.79361	-2.4775	0.74324	-3.5166	-2.667	-2.6946	-0.82165	0.20614	-2.8798	0.10601	0.92342	-0.97659
DLEC1	0.0421017	0.26981	-1.04563	0.484432		-2.1455	0.33122	0.23366	-1.6141	-0.66864	-3.6715	-0.13152	1.3995	0.19337	0.48537	-1.3229	0.21698	0.77266	-0.26754	-1.0288	-0.76585	-1.6422	-0.21756	-2.2053	-3.6628	-2.9862	0.050876	-3.5789	-3.013	-2.2145	-0.59271	-0.66759	-2.7174	1.1588	-0.84172	0.31565	0.826	-0.68872	-1.8358	-3.1308	-3.4302	-3.2294	0.33846	-3.0021
L3MBTL4	0.0427982	0.271419	1.02822	2.03951		-0.68771	0.33122	-2.5219	-0.1833	-2.7182	-3.0475	0.45344	-0.92243	-2.3791	-1.6517	-4.3176	-0.78303	-0.22734	0.31743	-0.028771	0.23415	-2.4437	0.78244	-0.044608	-0.75055	-1.0436	0.63584	-3.5311	-2.8101	0.0095765	1.4073	0.33241	-0.79361	0.15877	1.4802	-2.5655	-0.75896	0.31128	-0.82165	1.7911	-1.997	-2.1317	0.33846	1.3453
CPA3	0.0443505	0.275951	1.08643	2.12348		-1.8209	0.33122	-3.2014	-1.1833	-2.7169	-2.8285	0.45344	-2.3414	-2.2387	0.48537	-2.3046	0.80194	-2.998	-1.2675	-0.028771	0.23415	-2.9441	-0.21756	0.54036	0.24945	-0.043625	3.2988	0.6805	-0.10863	-2.7793	1.9923	-2.2829	0.79135	-2.8401	-0.84172	-0.68435	0.826	-0.68872	-1.3358	-3.383	-0.68087	0.69097	-0.66154	0.60838
VIPR2	0.046329	0.281087	-1.11995	0.46011		1.6342	-1.2537	1.2337	-0.1833	1.3314	-0.1059	-0.13152	0.077566	-1.864	-1.0996	0.99901	-2.3736	-2.9823	-3.0621	-1.0288	-2.5113	-2.4194	-1.2176	-1.0446	-0.75055	-1.0436	-3.2221	-0.90447	-1.7954	-3.6584	-0.59271	-0.66759	-1.5796	-0.84123	4.2457	-2.4874	0.24104	-2.8819	-2.1599	-3.4716	0.9041	-2.5205	-3.1083	-0.97659
HIST1H2AJ	0.047212	0.282457	1.06448	2.09142		-0.68771	-2.0304	-3.7303	0.40166	-3.3321	0.47906	-0.13152	0.077566	-0.80663	-3.2599	-2.7736	-0.78303	-0.22734	-1.2675	-1.0288	0.81911	1.1897	-0.21756	0.95539	2.0568	-0.043625	0.050876	1.0955	-0.10863	1.3315	-3.7513	-0.66759	-0.79361	-2.2918	0.74324	0.31565	1.563	0.31128	-2.82	2.0135	-1.8132	-2.1164	0.33846	-1.7959
GTSF1	0.0480473	0.283882	1.00488	2.00678		0.31229	1.0682	-2.1547	-1.1833	0.33136	-0.1059	-0.13152	0.66253	1.1934	1.4854	-3.2279	-2.3233	-0.22734	-1.2675	2.5562	1.5561	0.77466	-1.2176	1.5403	0.24945	1.5413	0.63584	2.555	0.47633	2.0096	1.4073	2.6543	-1.9813	1.4807	2.7432	0.31565	-2.5719	0.31128	1.1783	-0.79386	-0.68087	0.10601	0.33846	1.6084
EEF1DP3	0.0486547	0.286329	1.03023	2.04235		-0.68771	-1.2537	-3.575	0.8167	0.33136	-2.0445	-1.1315	0.077566	1.1934	-1.0996	-3.2685	-2.584	0.35763	0.73247	0.55619	-2.4813	0.18969	-1.2176	0.54036	-0.75055	0.54134	1.3728	-0.90447	-0.10863	0.0095765	-0.59271	0.91737	-2.3772	-0.84123	1.4802	0.31565	0.24104	-3.973	1.1783	1.7911	1.3191	-0.89399	1.6604	2.3453
