# Supplementary material for: Different Transcriptome Features of Peripheral Blood Mononuclear Cells in Non-Emphysematous Chronic Obstructive Pulmonary Disease
Source: Int J Mol Sci. 2023 Dec 20;25(1):66. doi: 10.3390/ijms25010066 (PMC10779039; doi:10.3390/ijms25010066)
Supplement: Supplementary file 1 [file ijms-25-00066-s001.zip › 121423 supplementary Table S2.xlsx]

## Sheet: DEGs between Emp and Non-emp
Gene	p-value	q-value	Difference	Fold change		Emp	Emp	Emp	Emp	Emp	Emp	Emp	Emp	Non Emp	Non Emp	Non Emp	Non Emp	Non Emp	Non Emp	Non Emp	Non Emp	Non Emp	Non Emp	Non Emp	Non Emp	Non Emp	Non Emp
CDKN2B-AS1	8.44631e-06	0.0974606	2.11872	4.34308		-3.5401	-3.1038	-2.4917	-2.858	-2.3291	-2.7898	-3.2076	-3.4919	-2.864	-1.0288	0.15877	-2.1042	-0.82165	-0.79386	0.3674	-1.8757	-0.89399	-1.1086	0.0095765	0.40729	-0.66759	-0.79361
PLEKHH2	1.88781e-05	0.0974606	2.45175	5.4708		-1.8956	-3.9863	-3.479	-2.7219	-1.8243	-2.9755	-3.6063	-3.5782	-1.2675	-1.0288	-1.9912	-0.81031	0.17835	-0.79386	-1.1968	0.6805	0.69097	-0.10863	0.0095765	-2.694	-0.66759	1.2064
LOC100507387	2.35526e-05	0.0974606	2.80249	6.97642		-2.0838	-2.2983	-3.982	-1.0446	-2.2819	-3.5886	-4.595	-2.4473	-0.26754	0.97123	-2.315	0.18969	0.17835	0.20614	-1.2176	1.0955	1.106	1.2133	0.59454	0.40729	-2.1961	0.20639
TMEM86B	8.24419e-05	0.197541	1.10188	2.14634		-0.043625	0.23415	1.3156	-0.044608	0.9041	0.92342	1.0509	2.0568	1.9024	2.1411	1.9661	1.7747	1.7633	1.2061	2.4829	2.2655	1.691	2.2133	1.8169	1.7292	2.1398	1.5283
NINL	0.00026491	0.251008	2.37392	5.18349		-3.141	-2.2211	-0.68435	-1.0446	-0.68087	-2.9139	-2.8043	-0.75055	0.73247	-3.2817	1.7437	0.18969	1.1783	1.2061	0.3674	0.095533	0.10601	0.89137	1.3315	0.40729	1.3324	2.0137
LINC00869	0.000285016	0.251008	1.02658	2.03719		1.2783	0.81911	1.3156	0.95539	0.31913	0.33846	0.63584	1.8344	1.9024	2.4307	2.7437	1.5116	2.5003	2.5281	1.1044	2.4175	1.691	2.2133	2.1795	1.4073	1.3324	1.5283
MIR5094	0.00106546	0.325475	1.658	3.1558		-3.0465	-3.4137	0.31565	-1.0446	-2.6824	-2.9419	-2.9995	-2.2059	-1.2675	-1.0288	-2.116	-1.7091	-0.82165	-0.79386	0.3674	-0.90447	0.10601	-0.10863	0.0095765	-0.59271	0.33241	0.20639
OSGEPL1-AS1	0.00124845	0.32975	1.38517	2.61203		-2.7721	-2.994	-3.3116	-2.0271	-2.111	-2.1905	-2.9531	-3.1792	-0.26754	-1.0288	-0.84123	-2.6184	-0.82165	-0.79386	-1.2176	-0.90447	-0.89399	-1.1086	-3.6423	-2.7005	-0.66759	-0.79361
AQP9	0.00137266	0.339016	-1.18649	0.43937		3.7113	4.4821	3.9006	3.2773	3.7786	4.2927	5.3907	4.2495	3.4329	3.7786	2.3287	1.9971	3.1783	2.2061	3.8699	2.555	2.5654	4.2489	2.3315	3.9309	2.3324	2.5283
LOC100506159	0.00170819	0.339016	3.08845	8.50579		-4.0057	-2.8173	0.90061	-1.0446	-2.8351	2.7979	-0.94912	-3.7224	1.3174	-1.0288	-0.84123	1.9971	1.1783	3.85	3.4263	1.6805	1.4279	3.3508	-0.99042	1.7292	2.9174	2.7913
SCARNA20	0.00206929	0.339016	-1.42671	0.371978		-1.0436	0.23415	-0.68435	-1.9657	-0.68087	-1.9245	-0.94912	-0.75055	-2.5268	-1.0288	-3.2979	-3.5916	-3.2725	-0.79386	-1.2176	-3.4946	-3.1561	-2.8009	-0.99042	-2.249	-2.3125	-2.8293
FAR2	0.00209907	0.339016	-1.20497	0.433777		3.0438	3.0415	2.123	2.1253	2.9041	3.2453	3.5744	3.0568	1.5398	1.9712	0.15877	1.5116	2.5003	2.0135	1.9524	3.0955	2.2759	-0.10863	1.8169	2.4073	0.91737	1.5283
PRMT7	0.00216819	0.339016	1.17538	2.25853		1.7637	1.5561	0.31565	-1.0446	1.3191	0.92342	1.3728	1.2494	1.3174	2.2932	2.6182	2.7747	2.8788	0.7911	2.2419	1.4175	2.4279	2.9788	2.0096	1.4073	2.1398	2.2064
PRICKLE2	0.00289571	0.339016	-1.47048	0.360862		-0.043625	-0.76585	-0.68435	-0.044608	-0.68087	-0.66154	-0.94912	-2.7979	-3.1019	-2.5189	-2.4127	-3.6431	-2.0296	-2.3579	-3.1115	-2.7824	-2.5115	-3.0461	-2.1896	-0.59271	0.33241	-2.22
LOC100506801	0.00304202	0.339016	-1.41161	0.375891		-0.043625	-2.5205	-0.68435	-1.0446	-2.7608	0.33846	-0.94912	-0.75055	-1.2675	-3.1819	-2.7382	-2.5994	-2.4298	-3.217	-3.7596	-2.4618	-0.89399	-1.7089	-2.9263	-2.6369	-1.3345	-3.3332
PMS2P3	0.00312645	0.339016	1.738	3.33571		-2.9434	-2.7915	-0.68435	0.54036	-2.5707	1.3385	-0.94912	-2.335	1.0544	0.97123	0.15877	0.18969	1.1783	-0.79386	0.3674	1.4175	-0.89399	1.2133	0.0095765	0.40729	-0.66759	1.5283
TREM1	0.0035096	0.339016	-1.02176	0.492515		4.2043	4.0921	3.9006	3.5403	3.4066	3.6604	4.5103	3.8344	4.0544	3.1411	1.4807	3.7747	2.3483	3.3761	3.9117	2.555	2.5654	3.2133	1.3315	2.4073	3.0329	3.0137
TUFT1	0.00360133	0.339016	1.87129	3.6586		0.95638	-3.8588	-0.68435	-2.719	1.3191	-0.66154	-2.0478	-2.7095	1.7325	1.2932	1.4807	1.1897	1.5003	-0.79386	-0.21756	0.095533	0.10601	0.47633	0.0095765	0.99226	-0.66759	0.79135
TUBG1	0.00365364	0.339016	1.08078	2.11518		1.2783	1.2342	0.31565	1.5403	0.31913	2.3385	0.050876	-0.75055	1.3174	2.1411	2.3287	0.77466	1.5003	1.7911	2.6893	2.555	2.106	2.5918	1.3315	1.4073	1.6543	2.0137
TTC28	0.00369701	0.339016	1.89638	3.72279		-1.3855	-0.76585	-3.3119	-1.0446	-3.1493	-3.2408	-2.3724	-0.75055	-0.26754	0.55619	-4.503	0.18969	0.17835	0.20614	0.78244	0.095533	0.10601	1.2133	1.0096	-0.59271	0.33241	-0.79361
NTPCR	0.0038209	0.339016	1.06273	2.08888		-1.0436	1.8191	0.90061	-0.044608	1.6411	0.33846	0.63584	0.83442	2.1919	0.97123	1.1588	2.1897	1.9857	0.7911	2.2419	1.0955	1.691	1.6987	2.469	2.5772	0.91737	1.7914
LOC101927156	0.00436423	0.342294	1.42283	2.68111		-1.0436	0.23415	-3.0673	0.54036	0.9041	1.3385	0.050876	0.83442	1.9024	2.6717	2.3287	1.1897	0.76332	0.7911	0.78244	1.4175	2.106	1.4763	1.5945	0.99226	0.33241	1.2064
IDH1-AS1	0.00447357	0.342294	-1.4543	0.364933		-2.3033	-0.76585	-0.68435	-2.3489	0.31913	0.33846	0.050876	0.24945	-1.2675	-2.6634	-1.9	-0.81031	-1.65	-3.3058	-2.5247	-1.7761	-2.6486	-3.5463	-1.7837	-0.59271	-1.3313	-3.5626
ARHGEF10	0.00483828	0.347894	1.84553	3.59385		-2.9776	-0.76585	0.90061	-1.0446	-0.68087	-3.118	-2.1277	0.24945	1.3174	-0.028771	4.1588	0.18969	0.76332	0.20614	1.1044	-0.90447	0.10601	-1.1086	0.59454	0.99226	0.91737	0.79135
DDI2	0.00541313	0.356729	1.56527	2.95933		-1.0436	-0.76585	-0.68435	-2.863	0.9041	-3.2986	-2.0353	-0.75055	1.0544	0.55619	0.15877	-0.81031	-0.82165	1.2061	0.3674	1.9029	0.10601	-1.1086	0.59454	1.7292	-0.66759	-0.79361
UQCRBP1	0.00548012	0.356729	-1.71471	0.304664		0.95638	0.23415	0.90061	1.2773	0.9041	0.92342	0.63584	1.5714	-0.26754	-1.0288	-2.8712	-0.81031	-2.9738	-0.79386	0.3674	1.4175	0.10601	0.47633	0.59454	0.40729	-2.7827	-2.8912
FCGR1C	0.00566334	0.356729	-1.4132	0.375477		0.54134	-0.76585	-0.68435	-1.0446	-0.68087	-2.698	1.3728	-2.1427	-2.578	-1.0288	-2.4299	-2.7023	-2.6669	-0.79386	-2.6524	-1.3205	-0.89399	-3.524	-2.4216	-2.8986	-1.9732	-2.5797
EXOC3-AS1	0.0061663	0.356729	1.41664	2.66963		-2.5988	-0.76585	0.31565	-3.2136	-2.0709	-2.5625	-2.3442	-0.75055	0.73247	-1.0288	0.15877	-0.81031	0.17835	-0.79386	-1.2176	-0.90447	-0.89399	-0.10863	0.59454	1.4073	-2.171	0.20639
TRIM2	0.00620568	0.356729	1.24707	2.37358		1.5413	0.23415	0.90061	-0.044608	0.31913	-2.7233	-0.94912	0.24945	1.7325	0.97123	1.4807	2.3596	1.7633	0.20614	1.1044	1.4175	1.4279	1.2133	0.0095765	0.40729	1.3324	1.2064
ARHGAP33	0.00622433	0.356729	1.18452	2.27288		-0.043625	-0.76585	1.6376	-1.0446	1.3191	-0.66154	-0.94912	-0.75055	0.73247	1.2932	0.15877	1.1897	1.5003	1.7911	-0.21756	0.6805	0.10601	0.89137	2.1795	0.40729	2.1398	1.5283
ZNF804A	0.00639241	0.356729	-1.59552	0.330903		0.95638	-0.76585	0.31565	2.1253	0.9041	2.1458	1.3728	2.2494	-0.26754	0.97123	-0.84123	-0.81031	0.17835	-2.4767	-1.2176	1.6805	0.69097	-1.1086	-2.8012	-0.59271	0.33241	0.20639
INSL3	0.00691588	0.368471	1.2971	2.45734		-1.0436	-0.76585	0.31565	-3.3359	-0.68087	-0.66154	-0.94912	-0.75055	-0.26754	-0.028771	1.1588	1.1897	1.1783	0.7911	-0.21756	0.6805	1.691	0.89137	-1.6292	-0.59271	0.33241	-0.79361
NDN	0.00702516	0.3694	1.36701	2.57936		-2.2361	-0.76585	-2.328	-3.2053	-2.3852	-0.66154	-3.3411	-2.0337	0.31743	-1.0288	-0.84123	0.18969	0.17835	-1.6632	-0.21756	0.095533	-3.0648	-2.4573	-0.99042	-0.59271	0.33241	-0.79361
MYLK4	0.0072043	0.372103	-1.79245	0.288681		0.54134	-0.76585	-0.68435	-0.044608	0.31913	0.92342	-0.94912	-0.75055	-2.4098	0.55619	-0.84123	-3.6156	-1.8621	-3.8073	-1.6991	0.6805	-3.9005	-3.3413	-2.227	-0.59271	-3.7093	-0.79361
CAHM	0.00768161	0.378411	-1.2671	0.415493		2.2783	1.2342	1.9006	1.5403	0.31913	2.6604	0.63584	0.24945	0.31743	0.97123	-0.84123	2.1897	-0.82165	0.7911	-1.2176	-0.90447	-0.89399	0.47633	0.59454	0.99226	-0.66759	0.20639
TAS2R43	0.00817936	0.386303	1.11933	2.17245		-1.0436	-2.7008	-1.8064	0.54036	-2.3695	-2.5792	-0.94912	-0.75055	-0.26754	-1.0288	-0.84123	-0.81031	0.17835	-0.79386	-0.21756	0.095533	-0.89399	-0.10863	-0.99042	1.4073	0.33241	-0.79361
SLC26A8	0.00854072	0.388614	-1.66377	0.315613		-1.0436	0.81911	0.31565	-1.0446	-3.1446	0.33846	0.050876	-3.7285	-3.3004	-3.2165	-2.1055	-0.81031	-3.455	-2.9883	-1.9955	-3.8746	-0.89399	-2.3833	-2.8019	-1.4796	-3.2455	-3.7575
DIRC3	0.00860739	0.388614	1.94235	3.84332		-2.945	-3.2245	0.31565	0.54036	-1.7921	-2.6128	-3.2421	-2.8473	1.5398	0.97123	-2.5178	1.5116	0.76332	-3.2137	-0.21756	-0.90447	-0.89399	1.2133	1.3315	0.40729	-0.66759	0.20639
TMEM45B	0.00862308	0.388614	1.54444	2.91691		-3.3378	-3.1767	-2.8573	-0.044608	-3.1465	0.33846	-0.94912	-0.75055	0.31743	-1.0288	-0.84123	0.18969	-0.82165	0.20614	-2.3071	0.6805	0.69097	-1.1086	1.3315	0.40729	-0.66759	0.20639
LINC00865	0.00872269	0.388614	1.6348	3.10544		-1.0436	0.23415	0.90061	-0.044608	-3.1032	0.33846	-2.106	-3.7763	-1.2675	0.97123	-0.84123	0.18969	0.76332	1.2061	1.1044	0.6805	0.10601	0.47633	0.59454	0.40729	2.6543	0.79135
ISM1	0.00892709	0.388614	1.6867	3.21921		-3.3374	-0.76585	-3.3501	-3.6004	-0.68087	-2.3974	-2.6999	1.2494	-1.2675	-0.028771	-0.84123	2.3596	-0.82165	-0.79386	-1.2176	-0.90447	0.69097	1.2133	0.0095765	-0.59271	-0.66759	-0.79361
CELSR2	0.00962133	0.388614	1.11291	2.16281		0.54134	-0.76585	0.90061	-0.044608	-0.68087	-1.7304	-0.94912	-0.75055	1.3174	0.55619	0.74373	1.1897	1.5003	0.20614	1.3674	0.6805	0.69097	-1.1086	0.0095765	2.2146	0.91737	-0.79361
PIPSL	0.00971593	0.388614	-1.30272	0.405361		0.95638	0.23415	0.31565	-0.044608	0.31913	1.3385	0.050876	1.2494	0.31743	-0.028771	0.15877	0.18969	-1.9759	-2.6241	-0.21756	-0.90447	0.69097	-0.10863	-0.99042	-2.5721	-2.6453	0.20639
AVIL	0.00984273	0.388614	1.77462	3.42147		-0.043625	-2.6251	-0.68435	-1.0446	-0.68087	-0.66154	-3.0961	-3.8518	0.73247	1.2932	0.15877	0.18969	2.3483	0.20614	0.3674	1.6805	0.10601	1.2133	-2.5344	-2.6595	-0.66759	0.20639
MID2	0.0103398	0.388614	1.04276	2.06016		1.2783	0.81911	-0.68435	2.2773	2.4891	0.33846	0.050876	1.5714	1.3174	2.1411	2.8592	2.1897	2.1783	1.2061	2.1044	2.0955	2.2759	0.47633	2.5945	2.4073	2.3324	2.6658
SH3GL1P1	0.0111128	0.394154	1.63063	3.09648		-3.915	-0.76585	-0.68435	-3.4274	-3.3371	-2.5087	0.050876	-0.75055	-3.0421	-0.028771	0.15877	0.18969	-0.82165	1.2061	-0.21756	-0.90447	0.10601	-1.1086	-0.99042	0.99226	-1.0804	1.5283
PRKCZ	0.0116978	0.399025	1.02302	2.03217		1.2783	0.81911	0.90061	0.95539	-0.68087	0.33846	-0.94912	2.2494	1.0544	0.97123	2.6182	2.5116	1.5003	2.0135	1.3674	1.4175	0.69097	2.0613	2.0096	0.40729	2.5023	1.7914
SGSM1	0.0118314	0.399025	1.4896	2.80811		-1.0436	0.23415	0.31565	0.95539	-0.68087	-0.66154	-4.237	-0.75055	1.5398	2.5562	1.7437	-0.81031	1.7633	-0.79386	0.78244	0.095533	0.69097	-0.10863	1.0096	0.99226	0.33241	0.79135
TFCP2L1	0.0120389	0.403259	1.63903	3.11456		-3.7206	-2.2158	-0.68435	-2.8077	0.31913	-3.0432	0.050876	-0.75055	-1.2675	1.7786	0.74373	0.18969	0.76332	0.7911	-1.2176	0.095533	-2.4388	-1.1086	-0.99042	0.99226	0.91737	1.2064
ZNF790	0.012395	0.409234	1.06775	2.09617		1.2783	0.81911	0.31565	2.2773	2.1265	0.33846	-0.94912	1.2494	1.0544	2.9712	2.8592	0.77466	2.6378	1.2061	1.9524	1.9029	1.106	2.7983	2.71	2.5772	1.9174	1.5283
H1FX-AS1	0.0125389	0.410707	-1.68855	0.310239		-2.7881	0.81911	0.31565	0.54036	-0.68087	-3.3452	0.050876	0.24945	-1.2675	-3.7904	0.15877	-2.5041	-0.82165	-3.041	-3.3227	-1.5612	-3.5236	-3.0497	-2.0913	-3.7803	-0.66759	-2.8452
LRFN3	0.0126891	0.411139	1.53739	2.90269		-1.0436	-0.76585	0.90061	-3.2097	-0.68087	-3.1285	-0.94912	0.24945	0.31743	-0.028771	1.1588	0.18969	1.5003	-2.7901	1.9524	0.095533	0.69097	1.2133	1.0096	0.99226	-0.66759	0.79135
MIR3975	0.0134692	0.412602	-1.28326	0.410865		0.54134	-2.4284	-0.68435	-1.0446	-0.68087	-0.66154	-0.94912	-0.75055	-1.2675	-3.1292	-3.0943	-3.1814	-0.82165	-3.9631	-2.641	0.095533	-0.89399	-2.3529	-0.99042	-1.6474	-2.8825	-2.8475
ADAMTSL5	0.0139144	0.412602	1.25604	2.38839		-0.043625	-4.0962	-2.435	0.54036	-0.68087	-0.66154	-2.1452	-0.75055	0.31743	-1.0288	0.15877	-0.81031	0.17835	-0.79386	0.78244	-0.90447	0.69097	-0.10863	0.0095765	-0.59271	0.91737	0.79135
TMEM79	0.014122	0.412602	1.58127	2.99233		-1.0436	-3.4878	1.6376	1.7628	-3.3092	0.33846	0.63584	0.83442	-0.26754	1.2932	1.9661	1.5116	1.1783	1.5281	0.78244	0.6805	1.106	0.89137	2.0096	1.9923	1.3324	1.5283
ITGA3	0.0141826	0.412602	1.77569	3.42401		-2.4854	-2.3553	-4.1251	-2.4249	0.31913	-2.3745	0.63584	-3.132	-1.7882	0.55619	1.4807	-0.81031	-1.7758	0.7911	-0.21756	-3.3984	-0.89399	0.89137	0.59454	-0.59271	0.91737	1.2064
HIATL2	0.014223	0.412602	1.51047	2.84904		-1.0436	-0.76585	0.31565	-2.8488	-0.68087	-3.5359	-0.94912	-3.6836	-1.2675	-1.0288	1.9661	0.77466	0.17835	0.7911	-0.21756	-0.90447	0.10601	-2.463	0.59454	-0.59271	0.91737	-0.79361
VNN3	0.0147725	0.413078	-1.32904	0.398033		1.2783	1.8191	2.3156	1.5403	1.9041	1.6604	1.6358	0.24945	1.7325	1.2932	-0.84123	0.18969	-3.0267	1.2061	-0.21756	0.095533	0.69097	1.6987	-0.99042	0.40729	-0.66759	1.5283
HMGB3	0.0148205	0.413078	-1.38292	0.383441		-0.043625	-0.76585	0.90061	-1.0446	0.9041	1.3385	1.8582	0.83442	1.0544	-1.0288	0.15877	0.18969	0.17835	-0.79386	-1.2176	0.6805	-2.2892	-1.1086	-2.8429	-2.6514	-0.66759	-2.0546
LINC00260	0.0158226	0.422255	1.13665	2.1987		-1.0436	1.8191	1.3156	0.95539	-2.235	-0.66154	1.0509	0.24945	0.31743	1.5562	2.1588	1.9971	1.5003	1.2061	1.5898	0.6805	1.4279	0.47633	1.0096	0.40729	1.9174	2.2064
UBAP1L	0.0158745	0.422255	1.3782	2.59944		-1.0436	0.23415	1.9006	-2.8449	0.31913	-2.2893	-2.5018	0.24945	-1.2675	0.97123	1.4807	1.1897	0.76332	-0.79386	0.78244	1.0955	0.69097	0.47633	1.3315	0.99226	0.33241	0.79135
ZNF311	0.0161053	0.422255	-1.14864	0.451049		-2.1834	-0.76585	-3.0718	-0.044608	-0.68087	-0.66154	-0.94912	-0.75055	-3.3198	-0.028771	-1.7985	-2.4771	-2.0864	-3.3172	-2.9897	-2.8213	-2.9339	-2.722	-1.5896	-2.199	-0.66759	-3.0687
HLA-DQB2	0.0161268	0.422255	1.47538	2.78057		-1.0436	-0.76585	-2.6925	-4.0879	-0.68087	-0.66154	-3.8423	-2.948	-0.26754	-1.0288	-0.84123	-2.4271	0.17835	-0.79386	1.3674	-0.90447	-0.89399	-1.1086	-0.99042	-2.6076	0.91737	0.79135
NRXN2	0.0161924	0.422255	1.35811	2.56349		-1.0436	-3.5474	-2.6369	-2.3891	-0.68087	-2.38	-3.5079	-0.75055	-1.2675	-1.0288	-2.082	-0.81031	0.17835	0.20614	-1.2176	-0.90447	-0.89399	-0.10863	1.3315	-3.5665	-0.66759	0.20639
RPL19P12	0.0162589	0.422255	1.46674	2.76396		-3.2551	-1.8369	1.3156	-0.044608	0.9041	0.92342	0.63584	-3.1952	0.73247	-0.028771	1.1588	0.18969	0.17835	1.2061	0.78244	1.0955	1.9134	0.47633	0.59454	2.4073	0.33241	1.5283
CYP4F29P	0.0165816	0.42442	1.93129	3.81396		-2.2733	-2.656	-3.8571	-1.0446	-2.8962	-2.1343	1.0509	-2.9571	-3.0494	-1.0288	0.15877	-2.9476	0.76332	0.7911	-0.21756	-2.8052	0.69097	1.2133	-0.99042	1.9923	1.3324	1.7914
ZSCAN20	0.0168333	0.427443	1.27845	2.42579		-2.4983	-3.2307	-2.434	-2.9409	-2.5006	-0.66154	-1.9811	-2.2842	-0.26754	-0.028771	-0.84123	-0.81031	-0.82165	-0.79386	-1.2176	-0.90447	0.69097	-4.3215	0.0095765	-0.59271	-2.5561	-2.0763
MIR4521	0.017149	0.427443	-1.52673	0.347064		0.54134	0.23415	0.31565	0.54036	0.9041	-2.8726	0.050876	-0.75055	0.73247	-4.011	-1.2678	0.18969	-1.6402	-0.79386	-2.9047	-1.986	-2.7223	-1.1086	-0.99042	-0.59271	-2.4193	-3.6736
ADM	0.0173638	0.427443	-1.28065	0.411611		0.95638	0.23415	0.90061	0.54036	0.9041	0.92342	2.3728	1.5714	0.73247	-4.1048	-0.84123	-0.81031	0.17835	0.7911	0.78244	-0.90447	0.10601	0.89137	0.0095765	0.40729	0.33241	-0.79361
POLQ	0.0174572	0.427443	1.3521	2.55283		-2.8967	-0.76585	-0.68435	-1.0446	-3.046	-2.459	-2.6772	-1.4788	-0.26754	-0.028771	0.15877	-0.81031	0.17835	-0.79386	0.3674	0.6805	0.69097	-0.10863	-3.5375	0.40729	-2.4128	-1.9364
CHRM3-AS2	0.0179314	0.427443	1.42109	2.67787		-3.3025	-1.2861	-0.68435	0.54036	-2.4857	0.33846	-3.1493	-2.0045	-0.26754	0.55619	-0.84123	0.77466	0.17835	-0.79386	0.3674	1.0955	0.69097	0.47633	-0.99042	0.40729	0.33241	-3.1497
CBX8	0.0179846	0.427443	-1.41478	0.375068		-1.0436	1.2342	-0.68435	-1.0446	0.31913	0.33846	0.050876	0.24945	-2.617	-0.028771	-0.84123	-3.4959	-0.82165	-0.79386	-1.2176	-3.0062	-0.89399	-2.5625	0.0095765	-3.2157	-2.5442	1.2064
SGOL1	0.0180508	0.427443	-1.37858	0.384598		-0.043625	0.23415	0.90061	-0.044608	0.31913	-2.7287	1.3728	0.24945	-1.2675	-3.0434	-0.84123	-1.6499	0.17835	-2.6569	-1.3166	-0.90447	0.10601	-1.1086	-3.6379	-0.59271	-2.318	0.20639
CRYGS	0.0180799	0.427443	1.55094	2.93007		-0.043625	-3.1416	-3.9079	-0.044608	-3.0923	-2.3288	0.63584	-0.75055	0.31743	0.97123	0.74373	0.18969	-3.3098	-0.79386	-0.21756	0.095533	0.69097	-0.10863	0.0095765	-0.59271	1.3324	0.20639
HTATSF1P2	0.0185497	0.427443	-1.03701	0.487337		2.8633	3.0415	3.4856	3.2033	2.9041	3.862	1.0509	3.4974	2.4329	2.8781	2.3287	1.9971	1.9857	3.9066	0.3674	0.6805	1.4279	0.89137	1.3315	2.5772	2.1398	2.3763
HIST1H3D	0.0186211	0.427443	-1.56504	0.337969		-0.043625	0.23415	-0.68435	-0.044608	1.3191	0.33846	-2.6987	0.83442	0.31743	-3.1424	-3.382	1.1897	-2.3716	-0.79386	-0.21756	-3.0712	-2.945	-0.10863	-1.9999	-2.0404	-2.299	-2.3501
FKBP7	0.0186492	0.427443	-1.11366	0.462119		-0.043625	0.23415	-0.68435	-1.0446	-0.68087	0.33846	-0.94912	0.24945	-1.2675	-1.0288	-0.84123	-2.4083	-0.82165	-2.9591	-1.931	0.095533	-0.89399	-3.87	-1.6717	-0.59271	-2.1231	0.20639
C3	0.0188472	0.427443	1.28004	2.42845		-2.5877	0.81911	-1.5573	-1.0446	0.31913	0.33846	-1.6813	-3.229	-1.2675	-0.028771	0.15877	-0.81031	0.76332	-0.79386	1.3674	0.095533	0.10601	0.89137	0.59454	-0.59271	0.33241	2.0137
FIGNL2	0.0188728	0.427443	1.0919	2.13154		-1.0436	-2.5744	-2.7447	-2.2424	-0.68087	-0.66154	-0.94912	-2.3973	-2.8568	-1.0288	0.15877	0.18969	0.17835	-0.79386	-1.2176	0.095533	0.10601	0.47633	-0.99042	0.40729	-0.66759	-2.0347
EML5	0.0192273	0.427443	1.19992	2.29727		0.95638	-0.76585	1.3156	1.5403	0.31913	-0.66154	-0.94912	-3.4271	-0.26754	1.2932	0.74373	1.1897	1.5003	0.7911	0.3674	1.9029	1.106	0.47633	1.3315	0.99226	1.6543	0.79135
COL6A1	0.0195096	0.427443	1.25787	2.39143		-1.0436	-2.2318	-0.68435	-1.0446	-1.7768	0.33846	-0.94912	-2.7391	0.31743	-1.0288	0.15877	0.77466	1.5003	0.7911	-1.8951	-0.90447	0.10601	1.6987	1.0096	-2.1859	0.33241	-0.79361
RPP25L	0.0195804	0.427443	1.12739	2.18463		2.7637	2.0415	0.90061	1.9554	-1.6577	1.9234	2.6358	-0.75055	2.0544	1.9712	2.6182	2.1897	1.7633	2.2061	2.1044	3.0955	2.9134	2.3508	2.5945	2.2146	2.5023	2.3763
EAF2	0.0200196	0.427443	-1.10546	0.464754		2.5413	2.0415	1.3156	1.5403	1.6411	1.6604	2.2208	2.0568	1.9024	1.2932	0.74373	0.77466	1.1783	2.2061	1.1044	0.6805	-2.4175	-0.10863	1.3315	-0.59271	1.9174	0.79135
BCO2	0.0203126	0.427443	1.66817	3.17812		-3.8001	-0.76585	-0.68435	-3.6357	-2.675	0.92342	-0.94912	0.83442	0.73247	1.2932	1.1588	0.77466	0.17835	1.2061	-1.2176	0.6805	-2.7594	1.2133	-0.99042	-0.59271	1.6543	1.2064
ALS2CL	0.0204812	0.427443	1.56631	2.96147		0.54134	-2.3992	-0.68435	1.2773	-0.68087	0.33846	-4.3379	0.24945	0.73247	0.97123	0.15877	1.7747	0.17835	0.20614	1.3674	-2.0431	0.69097	2.4763	2.3315	0.99226	0.91737	1.2064
FAM161B	0.020615	0.427443	1.0178	2.02483		0.95638	1.5561	1.3156	1.5403	-2.2876	0.33846	0.050876	0.24945	1.3174	2.4307	1.7437	1.7747	1.9857	1.2061	0.78244	1.4175	0.69097	2.0613	1.8169	0.99226	2.3324	0.20639
P3H2	0.0208451	0.42795	-1.12644	0.458045		-0.043625	-0.76585	-1.533	-0.044608	-0.68087	-0.66154	-0.94912	-0.75055	-1.2675	-1.0288	-2.2949	-0.81031	-1.8779	-2.0579	-0.21756	-3.7884	-3.0038	-1.1086	-3.3222	-1.8079	0.33241	-3.0178
POMZP3	0.0209118	0.428382	1.30405	2.46921		-1.0436	-3.7608	-0.68435	-0.044608	-2.977	-0.66154	-0.94912	-3.7978	-1.2675	0.55619	1.1588	0.18969	1.1783	-0.79386	-1.2176	-0.90447	-0.89399	-2.0625	0.0095765	-0.59271	-0.66759	-0.79361
BACE1-AS	0.0217743	0.435387	1.10731	2.15444		-2.6357	-2.7332	-2.107	-2.4863	-0.92655	-3.5253	-4.2089	0.24945	-2.3115	-1.0288	-2.3189	-0.81031	-0.82165	-0.79386	-0.21756	-0.90447	-1.3801	-1.1086	-0.99042	-2.5039	-0.66759	-0.79361
SLC22A17	0.0222086	0.435599	1.03694	2.05187		-1.0436	-0.76585	-0.68435	-0.044608	-0.68087	0.33846	0.050876	-0.75055	0.73247	-0.028771	-0.84123	1.5116	0.17835	-0.79386	-0.21756	0.095533	-0.89399	2.0613	1.5945	0.99226	1.3324	2.5283
TAF6L	0.0222325	0.435599	1.6039	3.03964		-1.0436	1.2342	0.90061	-0.044608	-3.0951	-3.3838	-3.9893	0.24945	1.0544	-1.0288	2.4807	-0.81031	0.76332	0.20614	-0.21756	-0.90447	1.106	1.2133	0.59454	1.4073	0.33241	0.20639
HSPG2	0.0222443	0.435599	1.51848	2.8649		-1.0436	-3.8471	0.90061	-4.2738	-2.4596	-0.92466	-2.7269	-2.582	-1.2675	-0.028771	-2.3142	-0.81031	0.76332	0.7911	-1.8048	0.095533	0.10601	-1.1086	0.59454	-2.9712	0.33241	-0.79361
LOC100240735	0.0222816	0.435599	1.43306	2.70018		-1.0436	-1.8885	-1.8036	-0.044608	-1.8591	-0.66154	-2.9628	0.24945	-0.26754	1.7786	0.74373	1.1897	-0.82165	0.7911	-0.21756	-3.5186	0.69097	-1.1086	1.0096	1.4073	-0.66759	1.5283
OLMALINC	0.0229159	0.435599	1.54462	2.91728		-1.0436	-2.9592	-4.3146	-3.2373	-1.5512	-3.4594	0.63584	-2.8467	0.31743	-3.2711	-0.84123	-0.81031	-0.82165	-0.79386	0.78244	-2.2991	0.10601	0.89137	-0.99042	-0.59271	-3.1168	0.20639
ADAMTS10	0.0230581	0.435599	1.08212	2.11714		0.95638	-0.76585	0.31565	1.2773	0.31913	2.1458	1.0509	-1.5503	1.0544	2.5562	1.7437	2.6491	1.9857	0.7911	1.3674	0.095533	1.4279	0.47633	2.3315	1.4073	3.0329	0.79135
LOC646762	0.0232506	0.435599	-1.54385	0.342969		1.5413	-0.76585	0.31565	-1.0446	0.31913	1.3385	0.050876	-0.75055	-2.9248	-4.5286	-0.84123	0.18969	-1.7074	-2.9679	-4.1245	0.095533	0.10601	-1.1086	-0.99042	-0.59271	0.33241	-0.79361
ATP8B5P	0.0232875	0.435599	-1.42818	0.3716		1.2783	0.23415	-0.68435	1.2773	0.9041	0.92342	1.3728	0.83442	0.31743	-3.3184	0.15877	-2.9209	0.17835	0.20614	-0.21756	0.095533	1.106	-1.1086	-0.99042	1.4073	-3.3693	-0.79361
CD200R1	0.0233075	0.435599	1.62837	3.09164		-1.0436	-0.76585	0.31565	-2.5062	0.31913	-2.6336	-2.8637	1.8344	-1.2675	1.5562	1.9661	1.5116	0.17835	1.5281	1.1044	-2.8135	1.4279	0.89137	1.0096	-0.59271	1.9174	1.5283
NAT14	0.0250727	0.440487	1.348	2.5456		-0.043625	0.23415	-1.167	-3.0267	-2.3674	-1.7135	-3.5533	-0.75055	0.31743	-1.0288	0.15877	-0.81031	0.76332	-2.8362	1.1044	0.095533	-0.89399	-0.10863	0.59454	0.99226	0.91737	-2.0725
TSKS	0.0253197	0.440994	1.1581	2.23163		-0.043625	-0.76585	-2.5545	-1.0446	-2.9338	-2.4291	-2.0302	-0.75055	-1.2675	-2.1178	-0.84123	-0.81031	0.17835	-0.79386	1.1044	-0.90447	0.10601	0.89137	0.0095765	0.40729	-2.5062	0.79135
PANX2	0.0255346	0.441415	-1.21128	0.431885		0.95638	-0.76585	-0.68435	-0.044608	-0.68087	-0.66154	1.3728	-0.75055	-0.26754	-1.0288	-2.7466	-0.81031	-2.1751	-2.6428	0.3674	0.6805	0.10601	-2.3544	-2.1747	-2.5124	-2.8081	-0.79361
CEBPB-AS1	0.0260099	0.444136	1.09978	2.14322		-3.7439	-0.76585	-0.68435	-0.044608	-2.6941	-2.472	-2.5155	-2.9565	-1.4014	-0.028771	-0.84123	-2.785	0.17835	-0.79386	-0.21756	-0.90447	-0.89399	-1.1086	-0.99042	-0.59271	-2.2142	0.20639
LINC01061	0.0260808	0.444339	1.14446	2.21063		-2.7288	-2.4645	-2.9959	-0.044608	-2.8041	-2.5529	-0.91549	0.24945	0.31743	-1.7577	-0.84123	0.18969	0.17835	0.20614	0.3674	-2.321	-2.1132	-0.10863	-0.99042	-0.59271	-0.66759	-0.79361
PEX11A	0.0274375	0.444339	1.30398	2.46909		-0.043625	-3.8413	-0.68435	1.2773	1.6411	0.33846	-1.6776	1.5714	1.0544	1.7786	1.1588	0.77466	0.76332	0.20614	-0.21756	1.4175	1.691	1.4763	1.3315	0.40729	2.1398	1.7914
CR2	0.0285519	0.444339	-1.25754	0.418257		0.95638	-0.76585	-0.68435	0.95539	0.31913	1.9234	1.3728	1.2494	-3.2139	0.55619	-1.7615	-0.81031	0.17835	1.5281	-2.395	-0.90447	-0.89399	-1.1086	-0.99042	0.40729	0.33241	0.79135
ERCC8	0.028576	0.444339	1.29752	2.45805		-0.043625	-3.161	-3.6474	-1.0446	1.3191	0.33846	0.050876	-0.75055	-0.26754	1.2932	0.15877	-1.8693	1.5003	1.2061	0.3674	1.0955	1.106	-0.10863	0.0095765	0.40729	0.91737	0.20639
HIST2H2AB	0.0286828	0.444339	-1.43091	0.370898		-0.043625	-0.76585	-0.68435	-0.044608	-0.68087	-2.8419	0.63584	1.5714	0.31743	-3.3001	-0.84123	0.18969	-0.82165	-0.79386	-3.2526	-2.5576	-2.7581	-1.1086	-2.0891	-3.7573	-0.66759	-3.5865
TIAM2	0.028688	0.444339	1.33103	2.51582		0.95638	-1.9891	-0.68435	-1.0446	-2.6508	-2.8209	-2.3746	-3.3273	0.73247	-0.028771	-1.6067	0.77466	0.17835	-0.79386	-2.7203	-2.4111	-0.89399	0.89137	0.59454	-0.59271	-0.66759	0.79135
SLC4A5	0.0287333	0.444339	1.45242	2.73667		-3.4318	1.5561	0.31565	0.95539	-2.4553	-0.66154	-0.94912	-0.75055	1.0544	0.55619	1.4807	1.1897	0.76332	-0.79386	0.78244	0.6805	1.106	1.6987	2.3315	0.99226	1.6543	-2.6493
SERPINF1	0.0289955	0.444339	1.41674	2.66981		-0.043625	0.23415	1.3156	1.7628	0.31913	-3.5746	-3.4633	1.2494	0.31743	0.97123	1.4807	2.3596	1.5003	0.7911	1.5898	1.6805	0.10601	2.0613	0.59454	0.99226	1.3324	0.20639
TDRD9	0.0291438	0.444339	-1.51817	0.349128		0.95638	0.23415	-0.68435	0.95539	1.3191	0.33846	2.3728	0.24945	-1.2675	-3.5447	0.15877	-0.81031	-2.5773	-0.79386	1.1044	1.0955	0.69097	-0.10863	-0.99042	-2.8555	1.6543	-2.9627
MIR4459	0.030544	0.444339	1.24975	2.37801		-1.0436	-0.76585	-3.5271	-2.4279	0.31913	-3.5181	-2.7282	-2.5272	-1.2675	-0.028771	-0.84123	-0.81031	0.17835	-0.79386	0.3674	-3.4919	0.10601	0.47633	-0.99042	-0.59271	-0.66759	-2.5302
TMEM102	0.0305785	0.444339	1.19429	2.28833		1.5413	-0.76585	-0.68435	1.2773	0.31913	-3.333	-0.94912	-0.75055	1.3174	0.97123	-0.84123	0.18969	-0.82165	1.5281	1.5898	0.6805	0.10601	1.2133	1.8169	1.9923	0.33241	0.79135
PFAS	0.0306554	0.444339	1.00447	2.00621		1.7637	2.2341	0.90061	1.5403	0.31913	0.92342	0.63584	-2.8179	1.0544	1.5562	1.7437	1.7747	1.1783	1.5281	2.1044	1.4175	2.2759	1.4763	1.8169	2.5772	1.6543	1.5283
IFT172	0.0307037	0.444339	1.17761	2.26202		0.54134	-0.76585	1.9006	1.7628	-0.68087	-2.4495	-0.94912	0.24945	2.0544	1.5562	0.15877	1.5116	0.76332	0.20614	-1.2176	1.6805	1.4279	1.2133	2.3315	0.99226	1.9174	1.2064
TCL6	0.0310518	0.444339	-1.33085	0.397533		-1.0436	-0.76585	-2.6758	-0.044608	-0.68087	-2.4487	-0.94912	0.83442	-1.2675	-3.1343	-2.4512	-0.81031	0.17835	-2.137	-4.1337	-2.4948	-3.7439	-0.10863	-4.0046	-2.2594	-2.9154	-2.9543
TRIM47	0.0313053	0.444339	1.41205	2.66115		-2.9271	-2.7328	-3.3967	0.95539	0.9041	-0.66154	-0.94912	-3.5082	-2.3962	-1.0288	0.74373	1.5116	0.17835	0.20614	-1.2176	0.095533	-0.89399	-0.10863	0.59454	0.99226	0.33241	-0.79361
TOLLIP-AS1	0.0313343	0.444339	-1.20476	0.433841		0.95638	0.23415	-0.68435	-1.0446	-0.68087	-0.66154	0.050876	-0.75055	0.31743	-2.7577	-2.6934	-0.81031	-0.82165	-3.615	-3.16	0.095533	-0.89399	0.47633	-2.4149	-2.7473	-0.66759	-1.69
ANKRD20A5P	0.0313506	0.444339	1.0109	2.01517		-1.0436	0.23415	2.6376	2.9554	0.9041	2.5084	1.0509	0.83442	1.9024	3.6151	3.0657	2.3596	2.5003	0.7911	2.4829	1.9029	2.4279	2.5918	1.8169	1.4073	2.1398	2.7913
DCUN1D3	0.0319158	0.444339	-1.02189	0.492472		-0.043625	-0.76585	0.31565	-0.044608	0.31913	0.33846	-0.94912	-0.75055	-1.2675	-1.0288	-0.84123	-2.3846	-2.5024	-3.2825	0.3674	0.095533	-3.0753	-1.1086	-0.99042	-0.59271	-0.66759	0.20639
TMEM30B	0.0321432	0.444339	1.08997	2.1287		-3.9396	-0.76585	-0.68435	-1.0446	-0.68087	-3.0742	-2.9786	-0.75055	-2.5198	-1.0288	-1.5395	-0.81031	-0.82165	-0.79386	-1.2176	0.6805	0.10601	0.89137	0.0095765	-0.59271	-0.66759	-0.79361
STK33	0.0322461	0.444339	-1.3631	0.388747		-1.0436	-0.76585	-2.7207	0.95539	0.31913	0.33846	0.050876	-1.8452	-2.0606	-1.0288	-0.84123	-3.1384	0.17835	-4.1888	0.3674	-1.9404	-2.1444	-3.2655	-3.0374	-0.59271	-2.5345	-3.1015
CASP1P2	0.032341	0.444339	1.19486	2.28923		-2.6262	0.23415	0.31565	-3.5226	0.31913	-2.8128	-2.918	-1.8015	-0.26754	-1.0288	-0.84123	0.18969	0.76332	-0.79386	0.3674	-0.90447	0.10601	-0.10863	0.59454	-0.59271	-2.3833	-0.79361
CEP170B	0.0324572	0.444339	1.42192	2.67941		-1.0436	-0.76585	-0.68435	-2.8446	-2.6637	-2.4698	-3.3114	-1.5388	0.31743	-3.4513	0.74373	0.18969	-0.82165	-2.5421	-3.1461	0.6805	0.69097	-0.10863	-0.99042	0.99226	1.3324	-0.79361
ZNF322	0.0325879	0.444339	1.53302	2.89391		-1.0436	-1.7146	-2.36	-1.0446	-3.7786	0.33846	-3.512	-2.1336	1.7325	-1.0288	2.4807	-0.81031	-3.1485	0.7911	0.3674	0.095533	0.10601	-1.1086	0.0095765	-3.2481	-0.66759	-0.79361
SLC25A35	0.0327117	0.444339	-1.12469	0.458602		1.7637	1.5561	0.31565	1.7628	1.6411	0.33846	1.6358	0.83442	0.31743	-0.028771	0.74373	0.77466	1.1783	-0.79386	0.78244	0.6805	-0.89399	1.8914	-2.8393	-1.8629	0.33241	1.2064
ABCC2	0.0327685	0.444339	-1.26423	0.416323		-0.043625	0.23415	0.31565	0.54036	-0.68087	-0.66154	0.050876	1.5714	-3.2841	-1.0288	-0.84123	-0.81031	-0.82165	-2.5285	0.3674	0.095533	-0.89399	-1.6389	-3.3081	0.40729	-2.6209	1.5283
LOC102724297	0.0330434	0.444339	-1.20198	0.434678		-0.043625	-2.1977	0.31565	1.2773	0.31913	-0.66154	-0.94912	0.24945	-3.2431	0.55619	-0.84123	-2.4669	-3.0819	-0.79386	-1.2176	0.095533	-2.8739	-0.10863	-2.0833	-0.59271	-2.341	-0.79361
SUSD4	0.0331669	0.444339	1.70919	3.26977		-1.0436	2.0415	-2.726	1.2773	-3.011	-0.66154	-4.0998	-3.4021	-1.2675	1.2932	1.1588	1.1897	0.76332	-0.79386	0.3674	1.0955	0.10601	-3.0386	1.5945	0.99226	-0.66759	0.79135
LINC01127	0.0331915	0.444339	-1.14294	0.452836		-1.0436	-0.76585	-0.68435	0.54036	-0.68087	0.92342	-2.1591	1.2494	-0.26754	-0.028771	-2.8872	-0.81031	-2.2854	-3.0757	-1.2176	-0.90447	-2.7206	-1.1086	-0.99042	-2.0688	0.33241	-2.5542
SNORD76	0.0336941	0.444853	1.31184	2.48257		-2.3113	0.23415	-2.8108	-1.0446	-1.8095	-3.3969	1.3728	-2.4936	0.73247	0.55619	-2.4945	-0.81031	-0.82165	0.20614	-0.21756	0.095533	0.10601	-1.1086	1.0096	-1.881	0.33241	1.2064
EFCAB7	0.0337111	0.444853	1.38251	2.60722		-4.1261	-1.8251	-3.1882	-0.044608	-0.68087	-2.7885	-0.94912	-3.1617	0.73247	-1.0288	0.74373	-0.81031	0.17835	0.20614	-0.21756	0.6805	-2.8269	-1.6429	-0.99042	-3.2172	0.33241	-2.1217
CD209	0.0341133	0.44908	-1.60665	0.328361		1.5413	-0.76585	-2.9064	-1.0446	1.6411	0.92342	0.050876	-3.3547	-0.26754	-3.6127	-0.84123	-3.5849	-0.82165	-1.6084	-2.111	-2.4216	-2.7856	-3.6799	-0.99042	-3.7114	0.33241	-3.2401
MMP28	0.0345747	0.452152	1.16839	2.24761		-3.4595	-4.0443	-2.5544	-2.6076	-0.68087	-0.66154	-3.5396	-3.1459	-1.2675	-3.3923	-3.3173	0.18969	-0.82165	-0.79386	-1.2176	-1.9526	-0.89399	-1.1086	-0.99042	-0.59271	-0.66759	-3.0301
CORO2B	0.0346016	0.452152	-1.23712	0.424219		-1.0436	-0.76585	-2.6026	-1.0446	-1.5324	0.33846	1.0509	0.83442	-3.8414	-3.0028	-0.84123	0.18969	-0.82165	-3.3865	-2.3536	-2.6539	-0.89399	-1.1086	-0.99042	-2.2866	-2.8743	-0.79361
ST3GAL3	0.0349734	0.453939	1.00228	2.00316		-0.043625	0.23415	-1.8477	-0.044608	1.9041	-2.4184	0.050876	-0.75055	0.73247	0.97123	0.15877	-0.81031	1.1783	0.20614	1.3674	0.6805	0.10601	1.4763	0.59454	1.4073	-0.66759	1.5283
GPA33	0.0351694	0.453939	1.36515	2.57603		-2.6059	-2.7743	0.31565	0.54036	-2.3639	-3.1558	-3.0942	-0.75055	0.73247	-1.0288	1.1588	0.18969	-3.204	-0.79386	-0.21756	1.0955	-0.89399	0.47633	0.0095765	-0.59271	0.33241	-2.4569
SNAPC5	0.0351771	0.453939	1.21313	2.3184		1.5413	1.8191	0.90061	-3.44	1.3191	0.33846	1.3728	2.4194	1.9024	3.2932	2.1588	2.3596	2.3483	1.5281	0.3674	2.0955	2.106	2.2133	2.469	1.9923	0.91737	2.2064
LEF1-AS1	0.035301	0.454269	-1.41825	0.374167		-1.0436	-0.76585	-1.9292	-0.044608	1.6411	-0.66154	-2.511	0.83442	-2.8548	-1.0288	-2.8426	-2.3927	-0.82165	-2.4469	-1.5876	-2.3799	0.69097	0.47633	-3.1734	-4.795	-2.1859	-2.354
C6orf229	0.035653	0.454411	-1.04963	0.483093		1.5413	-0.76585	-0.68435	-0.044608	0.9041	0.33846	0.050876	1.2494	-0.26754	-0.028771	1.1588	-0.81031	-0.82165	0.20614	-0.21756	-2.6804	-0.89399	-0.10863	0.0095765	-0.59271	-2.8004	-2.316
CCBL1	0.0360139	0.454679	1.01031	2.01435		0.95638	0.81911	2.123	0.54036	1.3191	-2.6034	1.0509	-1.2871	0.73247	0.97123	1.1588	1.7747	1.7633	1.7911	1.1044	1.0955	1.691	1.2133	2.0096	2.4073	0.33241	1.2064
HEATR9	0.0366214	0.454679	1.31775	2.49278		-2.8888	-3.4022	-0.68435	-2.4893	-0.68087	0.33846	-1.8619	-2.5474	0.31743	1.7786	-2.8594	-0.81031	0.76332	-2.5661	-0.21756	-0.90447	-0.89399	-1.1086	0.0095765	-1.6473	0.91737	0.79135
BHLHB9	0.0366704	0.454679	1.36764	2.58048		0.54134	-3.5156	-3.2811	-3.8487	-0.68087	0.33846	-0.94912	-3.0701	-0.26754	-0.028771	0.15877	-0.81031	0.17835	-0.79386	-0.21756	-0.90447	-0.89399	-0.10863	0.0095765	0.99226	-3.6882	0.20639
MORC1	0.0368043	0.454679	-1.12478	0.458573		-0.043625	-0.76585	-2.2388	-1.944	0.31913	-0.66154	0.050876	-0.75055	-3.0874	-1.0288	-2.5279	-0.81031	-1.9895	-2.8717	-1.2176	-2.717	0.10601	-0.10863	-3.7877	-2.6667	-0.66759	-2.9322
C3orf35	0.0372147	0.454679	1.36384	2.57369		-0.043625	1.2342	-4.4647	-1.0446	-2.6289	0.92342	-2.0451	-0.75055	1.0544	0.97123	0.15877	0.18969	-0.82165	0.7911	0.78244	0.095533	-2.5795	0.47633	0.0095765	1.4073	0.33241	0.79135
CACNA2D2	0.0379223	0.457161	1.39023	2.62121		2.1263	-1.9396	-0.68435	1.7628	0.9041	0.92342	-2.9967	-2.9032	1.0544	2.1411	1.4807	-0.81031	0.17835	0.20614	1.9524	0.6805	0.10601	1.4763	1.0096	1.4073	2.1398	1.5283
B3GNT7	0.0382352	0.458601	1.413	2.66291		-1.0436	-0.76585	-0.68435	-1.0446	-2.7035	0.33846	0.050876	-4.1676	1.0544	-0.028771	-0.84123	0.18969	0.17835	-3.3365	0.78244	0.6805	1.9134	-1.1086	0.0095765	1.4073	2.1398	-0.79361
MCTS2P	0.0385432	0.460503	-1.27316	0.413752		1.2783	-0.76585	-0.68435	-1.0446	0.31913	0.92342	1.0509	0.83442	-1.2675	0.55619	0.15877	0.18969	0.17835	-0.79386	-1.2176	-3.5685	-2.5097	-0.10863	-0.99042	-2.5148	-3.3827	0.79135
LINC01252	0.0390171	0.461135	1.45751	2.74635		-2.7452	-2.9664	0.31565	-2.617	0.31913	-3.1074	-0.94912	-2.0444	0.31743	1.2932	0.15877	0.18969	-2.2635	0.7911	-1.2176	-3.6088	1.106	-1.6748	1.0096	-1.5454	0.91737	0.79135
PAK4	0.0395803	0.461638	1.19043	2.28221		-3.6511	2.4041	0.31565	-1.0446	0.31913	0.92342	-0.94912	0.24945	1.3174	1.5562	1.1588	-0.81031	1.7633	1.5281	1.7824	1.0955	1.4279	0.47633	0.0095765	1.7292	0.91737	0.20639
FBXO8	0.0399009	0.461638	-1.04987	0.483012		1.7637	1.2342	1.6376	1.9554	1.9041	2.3385	1.6358	0.83442	0.73247	1.5562	1.4807	0.18969	2.1783	-0.79386	2.1044	-2.8944	0.10601	0.47633	1.3315	0.40729	0.91737	0.79135
SAMD13	0.0400977	0.461638	-1.23168	0.42582		-1.0436	-2.9571	-2.5431	0.54036	-0.68087	0.92342	0.63584	-0.75055	-1.2675	-3.3529	-0.84123	-2.6611	-2.6933	-0.79386	-3.2165	-0.90447	-0.89399	-3.7794	-0.99042	-2.2403	-0.66759	-3.2233
PHKG1	0.0401644	0.461638	1.29888	2.46037		0.54134	-3.6767	-3.0168	0.54036	-0.68087	-2.7905	0.050876	-3.3109	-0.26754	0.55619	0.15877	0.18969	1.1783	0.20614	-0.21756	0.095533	0.69097	-1.1086	-0.99042	-2.0513	-2.0629	0.20639
PRRT1	0.0405543	0.464001	1.06683	2.09483		-3.8099	-0.76585	-0.68435	-1.0446	-1.7679	-2.7823	-2.6985	-2.8303	-1.2675	-1.0288	-2.7775	0.18969	-0.82165	-0.79386	-1.7934	0.095533	0.10601	-1.1086	0.0095765	-2.1385	0.33241	-2.7392
PUS7	0.0410454	0.46473	1.00736	2.01023		-1.0436	0.23415	1.9006	-1.0446	-2.8797	0.92342	0.050876	0.83442	0.73247	1.5562	1.4807	-0.81031	1.5003	1.2061	0.3674	1.4175	1.4279	0.47633	1.0096	0.40729	1.3324	0.20639
PRNCR1	0.0411047	0.46473	1.10918	2.15723		0.95638	-3.2357	-0.68435	0.95539	1.9041	-0.66154	-0.94912	1.2494	0.31743	1.5562	0.74373	1.1897	1.9857	0.7911	1.7824	0.6805	1.106	0.89137	1.8169	1.7292	0.91737	-0.79361
PKMYT1	0.0411514	0.464835	-1.08782	0.470473		-1.0436	-0.76585	-0.68435	-0.044608	0.31913	-2.2241	-0.94912	-0.75055	-0.26754	-2.5109	-2.6417	-2.4011	-2.7603	-3.2668	-2.9994	-0.90447	-3.4545	-2.6116	0.0095765	-0.59271	-1.7847	0.20639
MSX2P1	0.041198	0.464938	-1.07696	0.474026		0.54134	-0.76585	0.31565	1.2773	-0.68087	0.33846	0.050876	0.24945	-1.2675	-1.0288	-0.84123	-0.81031	0.17835	-0.79386	0.3674	0.095533	-1.7101	-0.10863	1.3315	-3.1742	-3.3026	-1.6919
STRADB	0.0425612	0.466683	-1.06513	0.477928		1.7637	1.5561	1.9006	2.2773	0.9041	2.5084	1.6358	1.8344	0.73247	-0.028771	-0.84123	2.7747	-2.5238	1.2061	1.1044	2.555	1.106	0.89137	1.0096	0.40729	1.6543	0.20639
CNTNAP2	0.0426192	0.466683	-1.27965	0.411895		3.3487	0.81911	2.123	2.2773	0.9041	1.6604	0.050876	0.83442	1.0544	0.55619	0.15877	1.5116	1.9857	-0.79386	-2.4994	0.6805	1.106	-0.10863	-3.0661	0.99226	1.3324	0.20639
KCNK13	0.0429621	0.468656	-1.01964	0.493241		-1.0436	-2.3682	-0.68435	-1.0446	-0.68087	1.6604	-0.94912	0.24945	-1.2675	-1.0288	-0.84123	-2.5734	-2.4739	0.20614	-1.2176	-2.8848	-0.89399	-1.1086	-3.0838	-2.6499	-0.66759	-2.2965
ZWINT	0.043084	0.468917	-1.33032	0.39768		1.2783	-2.4604	-0.68435	0.54036	0.9041	0.33846	0.63584	-0.75055	-4.2539	-0.028771	-2.9576	0.18969	-2.3245	-2.35	-2.3772	0.095533	0.10601	-1.1086	-0.99042	-2.4253	-1.3377	0.79135
KCNMB4	0.0437313	0.46993	-1.25303	0.419567		-1.4149	2.0415	-0.68435	0.54036	1.3191	-0.66154	1.0509	-0.75055	-1.2675	-2.5357	-0.84123	-3.1652	0.76332	-0.79386	-1.2176	-0.90447	-0.89399	-2.551	0.59454	-1.219	-2.5181	1.5283
EMC9	0.0437723	0.46993	1.21727	2.32506		0.54134	1.5561	-0.68435	0.54036	-0.68087	-3.615	-0.94912	-2.1227	-1.2675	1.2932	0.15877	0.77466	1.1783	0.20614	1.7824	-0.90447	1.106	1.6987	0.0095765	0.40729	1.9174	-0.79361
ZNF571	0.0439181	0.46993	1.39459	2.62914		-3.7288	-3.6134	-2.9785	0.54036	0.31913	-0.66154	-2.6361	-0.75055	0.31743	-2.0105	0.15877	-3.7053	-0.82165	0.20614	-1.2176	1.4175	0.10601	0.47633	0.0095765	0.40729	0.33241	0.20639
RRN3P1	0.0443471	0.46993	1.16489	2.24216		-2.7989	-0.76585	-2.7954	-1.0446	-0.68087	-2.8676	0.63584	-1.8584	0.31743	-2.6506	0.15877	0.18969	-2.8065	0.20614	0.3674	-0.90447	-0.89399	0.89137	-0.99042	-0.59271	0.91737	0.79135
LOC729083	0.0446363	0.46993	-1.08711	0.470703		-0.043625	0.81911	-0.68435	0.54036	-0.68087	-0.66154	1.6358	0.24945	-0.26754	-1.0288	-2.8388	-0.81031	-3.2018	-0.79386	0.78244	0.095533	0.10601	-0.10863	-2.4606	0.40729	-0.66759	-2.3778
ZNF606	0.0448651	0.470402	1.34228	2.53551		-3.8814	-3.7712	-0.68435	-1.0446	0.9041	-2.9119	0.050876	-0.75055	0.31743	0.55619	-0.84123	0.77466	0.76332	1.5281	-0.21756	0.6805	-0.89399	-1.9356	-2.6268	-0.59271	-0.66759	0.79135
SYNE4	0.0449113	0.470488	1.16368	2.24029		-3.7483	-2.2302	-0.68435	-1.0446	-2.2307	-1.8963	-3.9211	-3.1816	-1.2675	-0.028771	0.15877	-0.81031	-3.8222	-2.7191	0.78244	-0.90447	-0.89399	-1.1086	-2.6327	-0.59271	-2.2157	-0.79361
BEND4	0.0455284	0.473718	1.15475	2.22646		-3.0286	-0.76585	0.31565	-3.6559	-2.9198	-3.128	0.050876	-0.75055	-1.2675	-2.106	0.74373	-0.81031	-0.82165	0.20614	-2.2902	-0.90447	0.69097	0.47633	-0.99042	-0.59271	-0.66759	0.20639
PDGFRB	0.0456393	0.473718	1.33248	2.51835		0.54134	0.81911	0.31565	0.95539	2.3191	2.3385	-3.5186	-0.75055	2.3174	2.5562	3.1588	0.18969	-0.82165	1.5281	2.3674	1.4175	2.4279	1.2133	1.5945	0.99226	2.7918	2.2064
AQP1	0.0457554	0.473752	1.11559	2.16683		-2.4198	-3.2829	-0.68435	-2.4423	-2.8611	0.33846	-2.9443	-2.682	-1.2675	-1.0288	-0.84123	-0.81031	-2.6957	0.20614	-3.4768	-0.90447	0.10601	0.89137	-0.99042	-0.59271	-0.66759	-2.0218
XCL1	0.0458912	0.473752	1.35933	2.56566		-3.0297	-1.6806	-2.6157	-2.252	-0.68087	-0.66154	-2.2939	-3.2504	-1.2675	-1.0288	-3.0215	1.7747	0.17835	0.7911	-1.2176	1.0955	-0.89399	-3.1786	0.0095765	-0.59271	0.91737	-3.3485
DCBLD2	0.0463605	0.474667	1.2515	2.38088		-1.9419	-2.2451	-0.68435	-3.5395	-2.5783	-2.6979	-2.3434	-0.75055	0.31743	-2.3012	-0.84123	0.18969	0.76332	0.20614	-1.2176	-3.7407	-0.89399	0.47633	1.0096	-0.59271	-2.0973	-3.1236
TWSG1	0.0463808	0.474667	-1.39189	0.381064		2.1263	0.81911	1.3156	1.5403	2.1265	0.92342	1.3728	-0.75055	0.73247	-2.3078	0.15877	2.3596	0.76332	0.20614	0.78244	-0.90447	0.10601	1.2133	1.0096	-4.2071	-2.0266	-0.79361
HOXB3	0.0469357	0.475124	1.22007	2.32957		-1.0436	-2.4391	0.31565	1.5403	1.3191	-0.66154	-0.94912	1.5714	1.7325	1.7786	2.1588	0.18969	1.5003	0.20614	2.3674	0.095533	2.4279	1.4763	-0.99042	-0.59271	2.9174	1.2064
MED14OS	0.0470634	0.475124	-1.16836	0.444927		-0.043625	-1.4423	-0.68435	-1.0446	0.31913	-0.66154	1.0509	-2.1024	-1.2675	-3.113	-3.4476	-1.6769	-3.2511	-0.79386	-0.76515	-3.0194	-2.939	-1.1086	-2.9864	0.40729	0.33241	-0.79361
SEMA7A	0.0471999	0.4756	-1.09424	0.468383		1.2783	0.81911	1.6376	1.7628	1.3191	-0.66154	1.0509	0.24945	0.31743	0.55619	1.9661	-0.81031	0.76332	-0.79386	-2.8533	-0.90447	0.10601	-0.10863	1.3315	0.40729	-2.4555	0.20639
AMDHD2	0.0473442	0.475895	1.02988	2.04185		-1.0436	1.2342	-2.0482	2.4148	1.6411	-1.5538	0.050876	-0.75055	0.73247	0.55619	1.1588	0.77466	1.1783	0.7911	1.3674	1.6805	1.106	1.2133	1.0096	2.2146	1.3324	-0.79361
FAM111B	0.0482036	0.479871	-1.25677	0.41848		2.6568	2.2341	0.90061	2.4148	2.4891	2.3385	1.6358	2.8344	2.0544	-3.5826	0.74373	2.3596	1.7633	2.5281	-0.21756	0.095533	0.69097	-0.10863	1.0096	1.4073	2.5023	1.7914
FHIT	0.0486579	0.481746	1.37707	2.59741		1.7637	0.23415	0.31565	3.8623	0.31913	-2.389	0.050876	2.9499	2.6394	1.9712	0.15877	3.0966	3.3483	2.3761	2.9524	3.8504	1.106	1.6987	0.0095765	2.5772	3.1398	2.7913
TRPM4	0.0486852	0.481746	1.33148	2.51661		-2.3995	-0.76585	-2.5492	-0.044608	-2.8564	-3.9101	-0.94912	-3.562	-2.9511	-0.028771	-3.1921	-0.81031	0.76332	0.7911	0.78244	-0.90447	-0.89399	0.89137	-0.99042	-0.59271	-3.2444	-0.79361
GPR161	0.0488122	0.481749	1.08564	2.12231		-2.9885	-2.7657	0.31565	-3.3143	-2.0194	-2.0576	-2.2109	-1.8728	-0.26754	-1.0288	-2.1419	-0.81031	0.17835	-3.3174	-1.2176	-0.90447	-0.89399	-0.10863	-3.3907	0.40729	-1.1105	0.20639
