# Supplementary figures and images for: Different Transcriptome Features of Peripheral Blood Mononuclear Cells in Non-Emphysematous Chronic Obstructive Pulmonary Disease
Source: MDPI journal article supplement (doi:10.3390/ijms25010066), 2023-12-20

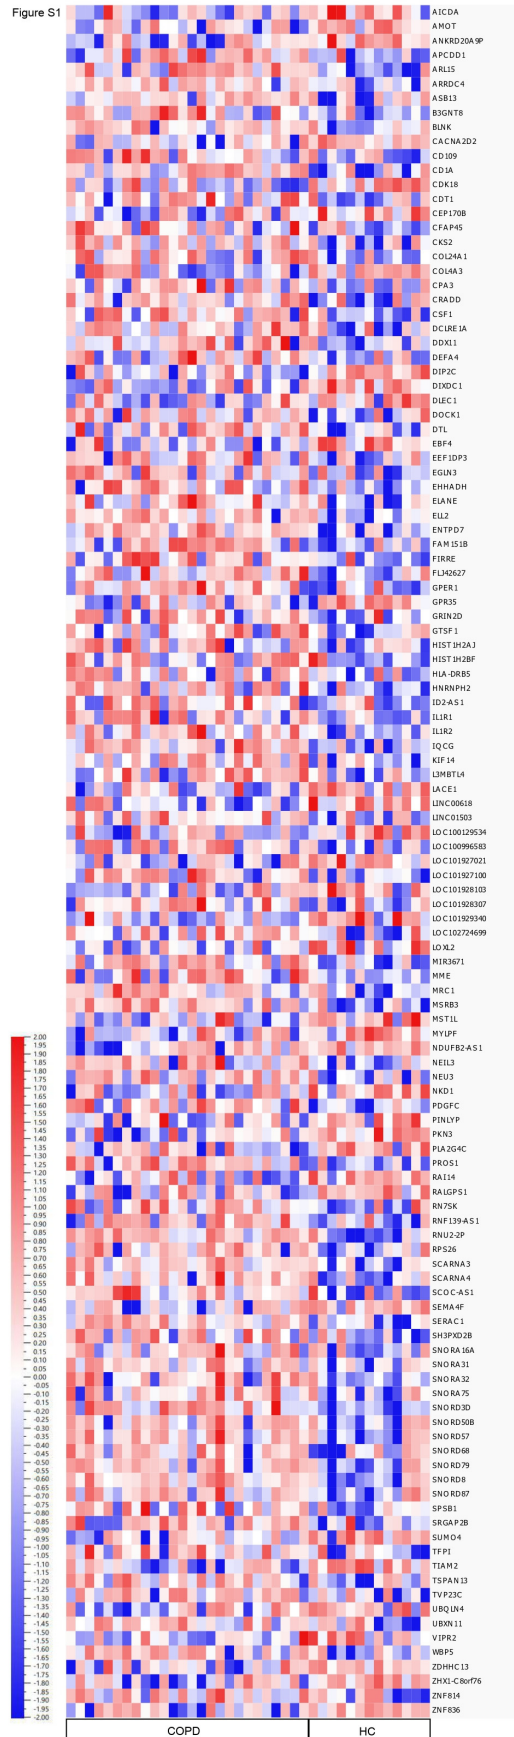

**Figure S1:** The details of Figure 3 are shown

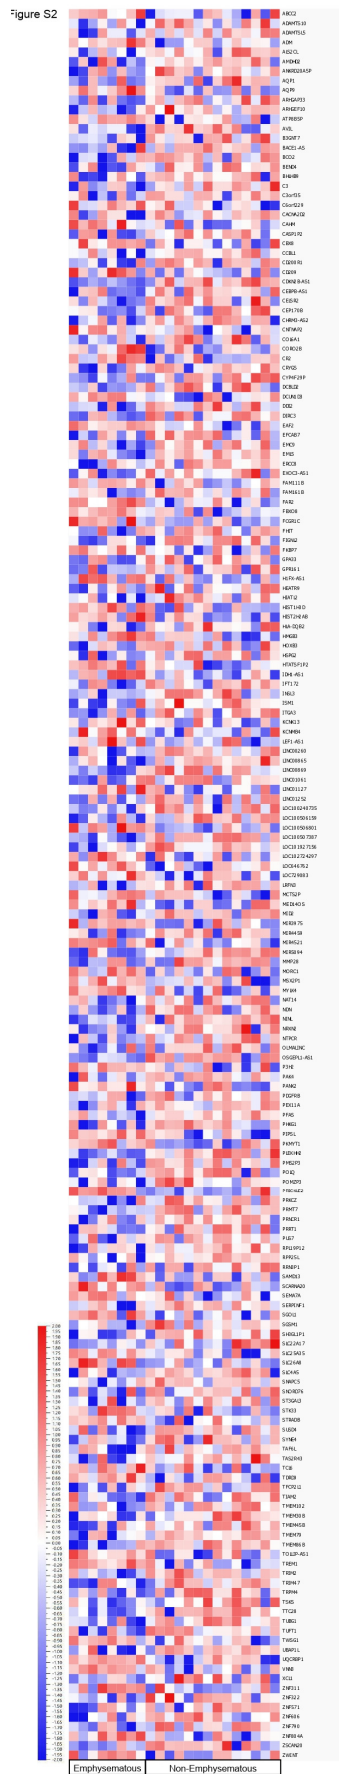

**Figure S2:** The details of Figure 6 are shown.

Supplement: s1 [file s1]
